# Supplementary material
Source: PubMed Central journal article supplement (PMC3760736)

## Supplemental Methods and Data

### Increased Proliferative Cells in the Medullary Thick Ascending Limb of the Loop of Henle in the Dahl Salt-Sensitive Rat

Chun Yang<sup>1</sup>, Francesco C. Stingo<sup>6</sup>, Kwang Woo Ahn<sup>2</sup>, Pengyuan Liu<sup>1,3</sup>, Marina Vannucci<sup>7</sup>, Purushottam W. Laud<sup>2</sup>, Meredith Skelton<sup>1</sup>, Paul O'Connor<sup>1</sup>, Terry Kurth<sup>1</sup>, Robert P. Ryan<sup>1</sup>, Carol Moreno<sup>1,4</sup>, Shirng-Wern Tsaih<sup>4</sup>, Giannino Patone<sup>8</sup>, Oliver Hummel<sup>8</sup>, Howard J. Jacob<sup>1,4</sup>, Mingyu Liang<sup>1</sup>, Allen W. Cowley, Jr.<sup>1,5</sup>

<sup>1</sup>Department of Physiology, <sup>2</sup>Division of Biostatistics, <sup>3</sup>Cancer Center, <sup>4</sup>Human and Molecular Genetics Center, <sup>5</sup>Cardiovascular Center, Medical College of Wisconsin, Milwaukee, WI 53226; <sup>6</sup>Department of Biostatistics, M.D. Anderson Cancer Center, Houston, TX 77005; <sup>7</sup>Department of Statistics, Rice University, Houston, TX 77005; <sup>8</sup>Max DeMax-Delbrück-Center, Berlin, Germany

Correspondence:

Mingyu Liang, [mliang@mcw.edu](mailto:mliang@mcw.edu), 414-955-8539

Allen W. Cowley, Jr., [cowley@mcw.edu](mailto:cowley@mcw.edu), 414-955-8277

## Detailed Methods

**Animals.** The consomic strain SS.13<sup>BN</sup> was developed from selective breeding of the salt-resistant Brown Norway rat (BN/MCW<sub>i</sub>; BN) and the Dahl salt-sensitive rat of the MCW colony (SS/JrHsdMcw<sub>i</sub>; SS) (Cowley 2001). BN chromosome 13 has been substituted into the SS genome in the SS.13<sup>BN</sup> rat. Male, inbred SS and SS.13<sup>BN</sup> rats, including breeder pairs and experimental rats, were maintained on the AIN-76A diet containing 0.4% NaCl (Dyets) and had free access to water. Rats were studied at 6 weeks of age while maintained on 0.4% salt diet or at 7 weeks of age after one week of 8% salt diet (Lu 2010). All animal protocols were approved by the Institutional Animal Care and Use Committee of MCW.

**Isolation of medullary thick ascending limbs (mTAL).** mTALs were isolated using a bulk dissection method as described previously (Trinh-Trang-Tan 1986, Ito 1999) except two sieves rather than one were used. Briefly, the kidneys were flushed with 10ml of cold saline followed by 10ml of HEPES buffered HBSS containing 200 U/ml of type II collagenase (Worthington Biochemical, NJ). The kidneys were collected and cut into thin slices transversely along the cortical-medullary axis. The inner stripe of the outer medulla was isolated and incubated with the collagenase solution at 37°C for 45 minutes with intermittent pipetting. At every 5 min, the digested tissue was pipetted out and passed through a 100µm and 70 µm sieve, and mTAL segments collected on the 70µm sieve by 1% BSA HBSS HEPES solution.

**Tamm-Horshfall protein staining.** Samples of isolated mTALs were put on poly-L lysine treated coverslips and stained with antibody against Tamm-Horshfall protein after fixation in cold 20% methanol and permeabilization (sc-19554 1:100 diluted in 2%BSA of TBS-0.1% TX for 1h at RT). Goat pAb to Fluorocein TR 2<sup>nd</sup> antibody (Abcam ab6654-100, 1:100) was then incubated at room temperature for 45 min. The fluorescent images and bright field images were acquired with a Nikon E600 upright microscope.

**RNA extraction.** RNA was extracted from isolated mTALs using TRIzol reagent. The quality and quantity of the extracted RNA were determined by Agilent BioAnalyzer 2100 and spectrophotometry.

**Real-time PCR.** Real-time PCR analysis of selected mRNAs was performed using the SYBR Green chemistry. 18S rRNA was used as the normalizer. Primer sequences used were shown in **Supplemental Table S1.**

**Affymetrix Expression Array analysis.** Affymetrix Rat Expression Array 230 2.0 was hybridized following the manufacturer's protocols. A total of 16 arrays were used to analyze two rat strains and two salt conditions (0.4% and 7 days of 8%) with four individual samples in each experimental group. Signal intensities were normalized by Robust Multi-array Average Expression Measure (RMA). Differentially expressed genes were identified by Rank Product methods with a threshold of  $\text{Log}_2(\text{expression intensity ratio}) > 0.5$  or  $< -0.5$  and a false discovery rate  $< 5\%$ . Ingenuity Pathway Analysis was used for pathway analysis.

**Chromosomal Representation Index.** Representation index was calculated as  $(n_{\text{chr}}/n)/(N_{\text{chr}}/N)$  as we described previously (Liang 2008), where  $n_{\text{chr}}$  is the number of differentially expressed probe sets located on a chromosome,  $n$  is the total number of differentially expressed probe sets with known chromosomal locations,  $N_{\text{chr}}$  is the number of probe sets in the entire array located on a chromosome, and  $N$  is the total number of probe sets on the array with known chromosomal locations.

**Bayesian Analysis.** A pathway-based analysis was performed using a modified version of the Bayesian model proposed by Stingo *et al.* (2011). The proposed Bayesian method integrates pathway information, retrieved from public databases, with the experimental data with the goal of identifying pathways and genes related to a binary phenotype. We used the Kyoto Encyclopedia of Genes and Genomes (KEGG) to retrieve the following information:

- **S**, a  $K \times p$  matrix indicating memberships of genes to pathways, with element  $s_{kj} = 1$  if gene  $j$  belongs to pathway  $k$ , and  $s_{kj} = 0$  otherwise.

- $\mathbf{R}$ , a  $p \times p$  matrix describing relationships between genes, with  $r_{ij} = 1$  if genes  $i$  and  $j$  have a direct link in the gene-gene network, and  $r_{ij} = 0$  otherwise.

The goal of the analysis is to study the association between the response variable and the pathways. Following the method of Stingo et al (2011), scores as measures of “pathway expression” summarizing the group behavior of included genes within pathways are defined as the first principal components from a Principal component analysis (PCA) on selected subsets of genes from each pathway. Relevant groups and important genes are then identified by introducing two binary vector indicators, a  $K \times 1$  vector  $\theta$  for the inclusion of the groups ( $\theta_k = 1$  if pathway  $k$  is included and  $\theta_k = 0$  otherwise) and a  $p \times 1$  vector  $\gamma$  for the inclusion of genes, i.e.  $\gamma_j = 1$  if gene  $j$  is selected for at least one pathway score, and  $\gamma_j = 0$  otherwise. Although the response  $Y$  is binary, we can relate a latent variable  $Z$  to the selected pathways and genes via a linear regression model

$$Z_i = \alpha + \sum_{k=1}^{K_\theta} T_{ik(\gamma)} \beta_{k(\gamma)} + \varepsilon_i, \quad \varepsilon_i \sim N(0,1).$$

Here  $K_\theta = \sum_{k=1}^K \theta_k$  is the number of selected pathways and where  $T_{ik(\gamma)}$  corresponds to the first principal component generated based on the expression levels.  $Z_i$  is a latent variable corresponding to the unobserved propensities of subject  $i$  to belong to one class ( $Y_i = 1$ ). When  $Y_i = 1$  the latent variable  $Z_i$  is constrained to be positive ( $Z_i > 0$ ) while  $Z_i < 0$  if  $Y_i = 0$ . The error variance is fixed to  $\sigma^2 = 1$  since it is evident that multiplying  $\alpha$  and  $\beta$  by a constant  $c$  and  $\sigma^2$  by the same constant leaves the model unchanged.

In the Bayesian approach to inference probability distributions (called “priors”) are specified for the unknown quantities of the model. We define a standard conjugate Normal prior for the intercept parameter  $\alpha$ . For the model parameter  $\theta$  we use a product of Bernoulli distributions with parameter  $\psi$  that determines the proportion of pathways expected a priori in the model. We use the latent vector  $\theta$  to specify a scale mixture of a normal density and a point mass at zero for the prior on each  $\beta_k$ :

$$\beta_k | \theta_k \sim \theta_k N(\beta_0, h) + (1 - \theta_k) \delta_0(\beta_k), \quad k = 1, \dots, K,$$

where  $\delta_0(\beta_k)$  is a Dirac delta function.

For the gene selection parameter  $\gamma$  we use a network prior that takes into account the biological relationships between genes within and across pathways, which are captured by the matrix  $R$ . A Markov Random Field (MRF) distribution

$$p(\gamma) \propto \exp(\mu \mathbf{1}_p \gamma + \eta \gamma' R \gamma)$$

defines a network prior over the binary vector  $\gamma$  taking into account the network structure defined by the matrix  $R$ . The parameter  $\mu$  controls the sparsity of the model, while  $\eta$  regulates the smoothness of the distribution of  $\gamma$  over the graph by controlling the prior probability of selecting a gene based on how many of its neighbors are selected. In particular, higher values of  $\eta$  encourage the selection of genes with neighbors already selected into the model.

Constraints need to be imposed to ensure both interpretability and identifiability of the model. We essentially want to avoid the following:

1. empty pathways, that is, selecting a pathway but none of its member genes;
2. orphan genes, that is, selecting a gene but none of the pathways that contain it;
3. selection of identical subsets of genes by different pathways, a situation that generates identical values  $T_{ik(\gamma)}$ , for pathway  $k$ , and  $T_{ik'(\gamma)}$ , for pathway  $k'$ , to be included in the model.

These constraints imply that some combinations of  $\theta$  and  $\gamma$  values are not allowed.

Having chosen the prior distributions, a Bayesian approach proceeds by updating knowledge on the model parameters with the information from the data via the calculation of the so-called “posterior” distribution. Here we are interested in the parameters  $\theta$  and  $\gamma$ , representing the

selection of genes and pathways related to the binary response variable. Stingo et al (2011) use a Monte Carlo Markov chain (MCMC) algorithm that can be seen as a stochastic search that explores the posterior space in an effective way, quickly finding the most probable configurations of genes and pathways, that is, those with high marginal probabilities, while spending less time in regions with low posterior probability. The MCMC procedure results in a list of visited models with included pathways indexed by  $\theta$  and selected genes indexed by  $\gamma$ , and their corresponding relative posterior probabilities. Pathway selection can be based on the marginal posterior probabilities  $p(\theta_k | T, Y)$ . Given a subset of selected pathways,  $P$ , the relevant genes from these pathways are identified based on the marginal posterior probability conditional on at least one pathway the gene belongs to being represented in the model,  $p(\gamma_j | T, Y, I\{\sum_{k \in P} \theta_k S_{kj} > 0\})$ .

#### **Defining boundaries of congenic segments using single nucleotide polymorphism (SNP) chips.**

We previously identified four congenic regions on rat chromosome 13 that had significant effects on hypertension, designated congenic lines 1, 5, 9, and 26 (Moreno 2007). We obtained precise boundaries of lines 5, 9, and 26 using the RATDIVm520813 SNP array. The SNP array was hybridized according to the manufacturer's instructions for the Affymetrix Genome-Wide Human SNP Nsp/Sty 6.0 array. Data were analyzed with the Affymetrix Power Tools apt-1.12.0 using BrImm-p algorithm without model-file.

**Immunofluorescence analysis of cell proliferation.** Flushed Kidneys were fixed in 10% formalin, paraffin embedded, and sectioned for immunofluorescence analysis. Proliferating cells were identified by positive staining of Ki-67 (Abcam ab16667, 1:250, 1hr incubation at room temperature, 45 min incubation with 2<sup>nd</sup> antibody of Alexa Fluor 488 goat anti-rabbit IgG, life technologies, A11034, 1:250). Cells in the G2/M phase were identified by positive staining of histone H3 phosphorylated at Ser10 (p-H3 or H3-P) (Abcam ab 5176, 1:250, 1 hr at room temperature, 45 min incubation with 2<sup>nd</sup> antibody of Texas Red anti-rabbit IgG(H+L), Vector Laboratories, T1-1000, 1:250). Cell nucleus was visualized by DAPI staining. Ten fields were randomly selected from each kidney. mTALs were identified by morphology. The numbers of all cells (cell nuclei), Ki-67 positive cells, and H3-P positive cells within mTALs were

manually counted. The investigator analyzing the images was blinded to the treatment conditions of the rats. The same staining condition was also used in cultured human Hela cells after fixation by cold 20% methanol and permeabilization by 0.1% triton-100.

## References for Supplemental Materials

1. Cowley AW Jr, Roman RJ, Kaldunski ML, Dumas P, Dickhout JG, Greene AS, Jacob HJ. Brown Norway chromosome 13 confers protection from high salt to consomic Dahl S rat. *Hypertension*. 2001; 37:456-461.
2. Ito O, Roman RJ. Role of 20-HETE in elevating chloride transport in the thick ascending limb of Dahl SS/Jr rats. *Hypertension*. 1999; 33:419-423.
3. Liang M, Lee NH, Wang H, Greene AS, Kwitek AE, Kaldunski ML, Luu TV, Frank BC, Bugenhagen S, Jacob HJ, Cowley AW Jr. Molecular networks in Dahl salt-sensitive hypertension based on transcriptome analysis of a panel of consomic rats. *Physiol Genomics*. 2008; 34:54-64.
4. Lu L, Li P, Yang C, Kurth T, Misale M, Skelton M, Moreno C, Roman RJ, Greene AS, Jacob HJ, Lazar J, Liang M, Cowley AW Jr. Dynamic convergence and divergence of renal genomic and biological pathways in protection from Dahl salt-sensitive hypertension. *Physiol Genomics*. 2010; 41:63-70.
5. Moreno C, Kaldunski ML, Wang T, Roman RJ, Greene AS, Lazar J, Jacob HJ, Cowley AW Jr. Multiple blood pressure loci on rat chromosome 13 attenuate development of hypertension in the Dahl S hypertensive rat. *Physiol Genomics*. 2007; 31:228-235.
6. Stingo, F.C., Chen Y.A., Tadesse, M.G. and Vannucci, M. Incorporating Biological Information into Linear Models: A Bayesian Approach to the Selection of Pathways and Genes. *Annals of Applied Statistics*. 2011; 5: 1978-2002.
7. Trinh-Trang-Tan MM, Bouby N, Coutaud C, Bankir L. Quick isolation of rat medullary thick ascending limbs. Enzymatic and metabolic characterization. *Pflugers Arch*. 1986; 407:228-234.



**Supplemental Table S1. Primer sequences used in real-time PCR.**

| Gene    | forward primer            | reverse primer            |
|---------|---------------------------|---------------------------|
| Col1a1  | TGGATGGCTGCACGAGTCACAC    | ATGGGCAGGCGGGAGGTCTT      |
| IL1b    | GGCTGACAGACCCCAAAGAT      | GTCGAGATGCTGCTGTGAGATT    |
| IL33    | GTTTTGTTTTGGAGAATGGATGTT  | GTGCAGGAAAGGAAGACTCGTAG   |
| Fam 129 | CGCTTCAGATCCCTCACG        | CGATGGCCACTGCTGTTCT       |
| Cdc73   | ATGCTTGCTGATGTTGATGCTT    | CGCATCCTGTTTATGTCcG       |
| Cdc2    | CCCCGGTTGACATCTGGAG       | CTGAGTCGCCGTGGAAAAG       |
| Cenpf   | AGGAGAGCCTGTGTGCATGTG     | TGGTACGCACAGGTTAcG        |
| E2f8    | GGGTGGGCGGGTTCATTT        | GTTTGAGCAGGTGCTGtG        |
| Cxcl13  | CTCCACCTCCAGGCAGAATG      | TCCCAGGGCGTATAACTTGAAT    |
| Ccr5    | CTATGCCTTTGTTGGGGAGAA     | GTGGACCGGGTATAGACTGAGC    |
| Matn    | CCTGGAGAACAGAGTCATCTAAGGA | TGCTAAAGTAGCACAGCCAGACTAA |
| Aqp1    | AGTGCTGATCTATGACTTCATCCTG | ATCCAGGTCATACTCCTCCACTTG  |
| Ut-b    | ACCTACAAAACAAGAAAAGGGTGGT | GAGAGCTGTTCCAAGTGAAGAAAAG |
| Pv-1    | GTCCAGCCTCTCTCTTAAAGTTTC  | AACCTGCAGACTCTAGAAAGGGTTC |
| Nkcc2   | ACGTCGGGGAGTTCAATCAGA     | TCAACCCTCCATCATCAAATAACC  |
| Aqp2    | GCCACCTCCTTGGGATCTATT     | AAGACCCAGTGATCATCAAACCTTG |
| Plekha6 | TGTTCTCAGGGTCAGGAGCA      | TCACTTTCCAGGGGCAGATG      |
| Slc45a3 | GTGGGGCTTGTTGAACCCTA      | GATGAGCTCACTGGCTCTGG      |
| Dars2   | TATGGCCAAGTCACGAAGCTC     | GCCGTCCTTCAGTTCCTGTA      |
| Elk4    | AGGATATTGCCGGTCAGGGA      | CTCACACAGCCTGGAAGGAA      |
| Golt1a  | TTGGAAACCTGCTGTTCCCTG     | ATTGAGCTGGAGGAGCCTTG      |

**Supplemental Table S2. ESTs differentially expressed in mTALs between SS and SS.13<sup>BN</sup> rats on 0.4% or 8% NaCl diets.** Log2R, log<sub>2</sub>(SS/SS.13<sup>BN</sup> ratio); LS, 0.4% NaCl diet; HS, 8% NaCl diet for 7 days; RP-FDR, rank product – false discovery rate.

**A. 0.4% NaCl diet**

| ProbeSet ID | Gene Symbol | UniGene ID | Alignments | Congenic line | Log 2R LS | RP-FDR LS | Gene Title                                                               |
|-------------|-------------|------------|------------|---------------|-----------|-----------|--------------------------------------------------------------------------|
| 1371194_at  | Tnfaip6     | Rn.195358  | ---        |               | 0.79      | 0.004     | tumor necrosis factor alpha induced protein 6                            |
| 1371731_at  | RGD1566215  | Rn.216502  | ---        |               | 0.86      | 0.002     | Similar to Coatomer gamma-2 subunit (Gamma-2 coat protein) (Gamma-2 COP) |
| 1373908_at  | ---         | ---        | ---        |               | 1.52      | 0.000     | ---                                                                      |
| 1378713_at  | ---         | Rn.211170  | ---        |               | -0.88     | 0.003     | ---                                                                      |
| 1379259_at  | ---         | Rn.146603  | ---        |               | -1.39     | 0.000     | ---                                                                      |
| 1382329_at  | ---         | ---        | ---        |               | 0.81      | 0.029     | ---                                                                      |
| 1383682_at  | ---         | Rn.147429  | ---        |               | -0.65     | 0.048     | ---                                                                      |
| 1386921_at  | Cpe         | Rn.7149    | ---        |               | 0.67      | 0.013     | carboxypeptidase E                                                       |
| 1387158_at  | Mep1b       | Rn.3520    | ---        |               | -0.68     | 0.019     | meprin 1 beta                                                            |
| 1389500_at  | ---         | Rn.216504  | ---        |               | 0.69      | 0.011     | ---                                                                      |
| 1390722_at  | ---         | ---        | ---        |               | 2.64      | 0.000     | ---                                                                      |
| 1391072_at  | Fcer2       | Rn.10326   | ---        |               | 0.76      | 0.010     | Fc fragment of IgE, low affinity II, receptor for                        |

|                |                |               |                                                            |               |       |     |                                                          |
|----------------|----------------|---------------|------------------------------------------------------------|---------------|-------|-----|----------------------------------------------------------|
|                |                |               |                                                            |               |       |     | (CD23)                                                   |
| 1395863<br>_at | Nr2f2          | Rn.178<br>15  | chr1:125284<br>519-<br>125293221<br>(+) // 77.25 //<br>q31 | -<br>0.6<br>3 | 0.045 |     | Nuclear receptor<br>subfamily 2,<br>group F,<br>member 2 |
| 1381402<br>_at | ---            | Rn.335<br>02  | chr1:125318<br>857-<br>125319254<br>(+) // 70.07 //<br>q31 | -<br>0.5<br>8 | 0.048 | --- | ---                                                      |
| 1387219<br>_at | Adm            | Rn.102<br>32  | chr1:168380<br>254-<br>168382426<br>(+) // 95.33 //<br>q33 | 0.9<br>7      | 0.003 |     | adrenomedullin                                           |
| 1390707<br>_at | Rgs10          | Rn.239<br>57  | chr1:187622<br>487-<br>187622918<br>(-) // 99.77 //<br>q36 | 0.6<br>6      | 0.025 |     | regulator of G-<br>protein signaling<br>10               |
| 1390026<br>_at | Bag3           | Rn.463<br>04  | chr1:187803<br>867-<br>187804835<br>(+) // 99.69 //<br>q36 | 0.7<br>3      | 0.010 |     | Bcl2-associated<br>athanogene 3                          |
| 1390801<br>_at | RGD1359<br>349 | Rn.238<br>70  | chr1:228102<br>009-<br>228102637<br>(+) // 72.48 //<br>q51 | 0.8<br>1      | 0.003 |     | similar to<br>hypothetical<br>protein<br>MGC34760        |
| 1380063<br>_at | Ch25h          | Rn.155<br>971 | chr1:238457<br>016-<br>238457640<br>(-) // 99.68 //<br>q52 | 0.7<br>9      | 0.005 |     | cholesterol 25-<br>hydroxylase                           |
| 1389424<br>_at | LOC3651<br>57  | ---           | chr1:564979<br>00-<br>56498510<br>(+) // 99.67 //<br>q12   | -<br>0.6<br>8 | 0.019 |     | similar to<br>ribosomal<br>protein L22<br>proprotein     |
| 1373759<br>_at | ---            | Rn.329<br>94  | chr1:786664<br>19-<br>78666858 (-)<br>// 98.21 //<br>q21   | 1.2<br>7      | 0.003 | --- | ---                                                      |

|                |           |               |                                                               |          |       |                                                                       |
|----------------|-----------|---------------|---------------------------------------------------------------|----------|-------|-----------------------------------------------------------------------|
| 1370862<br>_at | ApoE      | Rn.323<br>51  | chr1:790036<br>32-<br>79005597 (-)<br>// 94.03 //<br>q21      | 0.6<br>1 | 0.040 | apolipoprotein E                                                      |
| 1370174<br>_at | Ppp1r15a  | Rn.223<br>2   | chr1:959940<br>24-<br>95996671 (-)<br>// 98.79 //<br>q22      | 0.8<br>7 | 0.011 | protein<br>phosphatase 1,<br>regulatory<br>(inhibitor)<br>subunit 15A |
| 1398243<br>_at | Csrp3     | Rn.113<br>45  | chr1:986016<br>80-<br>98611747 (-)<br>// 96.77 //<br>q22      | 0.6<br>2 | 0.040 | cysteine and<br>glycine-rich<br>protein 3                             |
| 1367913<br>_at | Cygb      | Rn.105<br>938 | chr10:10675<br>9676-<br>106769559<br>(-) // 86.6 //<br>q32.3  | 0.6<br>3 | 0.040 | cytoglobin                                                            |
| 1377092<br>_at | ---       | Rn.153<br>630 | chr10:10795<br>7147-<br>107957566<br>(-) // 96.32 //<br>q32.3 | 0.6<br>6 | 0.047 | ---                                                                   |
| 1387946<br>_at | Lgals3bp  | Rn.325<br>1   | chr10:10838<br>8180-<br>108397523<br>(-) // 99.81 //<br>q32.3 | 0.5<br>7 | 0.049 | lectin,<br>galactoside-<br>binding, soluble,<br>3 binding protein     |
| 1372590<br>_at | ---       | Rn.538<br>80  | chr10:10845<br>2555-<br>108453216<br>(+) // 100.0 //<br>q32.3 | 0.6<br>7 | 0.029 | ---                                                                   |
| 1371785<br>_at | Tnfrsf12a | Rn.105<br>040 | chr10:12940<br>331-<br>12940788 (-)<br>// 96.21 //<br>q12     | 0.7<br>2 | 0.011 | tumor necrosis<br>factor receptor<br>superfamily,<br>member 12a       |
| 1387965<br>_at | Havcr1    | Rn.111<br>54  | chr10:31834<br>518-<br>31858017<br>(+) // 97.99 //<br>q21     | 0.7<br>0 | 0.014 | hepatitis A virus<br>cellular receptor<br>1                           |
| 1382805        | LOC3605   | Rn.106        | chr10:63893                                                   | -        | 0.007 | similar to                                                            |

|            |        |           |                                               |  |      |       |                                                 |
|------------|--------|-----------|-----------------------------------------------|--|------|-------|-------------------------------------------------|
| _at        | 70     | 278       | 773-63894421 (+) // 100.0 // q25              |  | 0.66 |       | myosin XVIIIa                                   |
| 1370832_at | Ccl4   | Rn.37880  | chr10:71759428-71761403 (+) // 99.87 // q26   |  | 0.64 | 0.030 | chemokine (C-C motif) ligand 4                  |
| 1370864_at | Col1a1 | Rn.2953   | chr10:83622548-83639368 (+) // 98.17 // q31   |  | 0.77 | 0.011 | collagen, type I, alpha 1                       |
| 1388116_at | Col1a1 | Rn.2953   | chr10:83622548-83639368 (+) // 98.17 // q31   |  | 0.72 | 0.014 | collagen, type I, alpha 1                       |
| 1374679_at | Higd1b | Rn.38891  | chr10:92010249-92011724 (+) // 94.65 // q32.1 |  | 0.58 | 0.049 | HIG1 hypoxia inducible domain family, member 1B |
| 1377390_at | Bace2  | Rn.38581  | chr11:37427898-37428364 (+) // 98.94 // q12   |  | 0.62 | 0.031 | beta-site APP-cleaving enzyme 2                 |
| 1368826_at | Comt   | Rn.220    | chr11:84576766-84581706 (+) // 86.88 // q23   |  | 0.81 | 0.010 | catechol-O-methyltransferase                    |
| 1374104_at | Cldn5  | Rn.17420  | chr11_random:1224086-1224641 (-) // 99.82 //  |  | 0.63 | 0.030 | claudin 5                                       |
| 1395153_at | Cldn15 | Rn.202600 | chr12:20844848-20845311 (+) // 51.17 // q12   |  | 0.74 | 0.009 | claudin 15                                      |
| 1367577_at | Hspb1  | Rn.3841   | chr12:21911200-21912765 (-)                   |  | 0.92 | 0.006 | heat shock protein 1                            |

|                |         |               |                                                             |                           |               |       |                                                        |
|----------------|---------|---------------|-------------------------------------------------------------|---------------------------|---------------|-------|--------------------------------------------------------|
|                |         |               | // 93.62 //<br>q12                                          |                           |               |       |                                                        |
| 1372935<br>_at | Tmem119 | Rn.155<br>038 | chr12:43869<br>671-<br>43870067<br>(+) // 95.19 //<br>q16   |                           | 0.6<br>3      | 0.040 | transmembrane<br>protein 119                           |
| 1393179<br>_at | ---     | Rn.203<br>900 | chr12:79579<br>31-7958631<br>(+) // 98.3 //<br>p11          |                           | -<br>0.6<br>4 | 0.037 | ---                                                    |
| 1369268<br>_at | Atf3    | Rn.966<br>4   | chr13:10719<br>1621-<br>107223850<br>(-) // 99.58 //<br>q27 |                           | 1.2<br>1      | 0.004 | activating<br>transcription<br>factor 3                |
| 1379286<br>_at | Rnf152  | Rn.169<br>056 | chr13:11309<br>459-<br>11310197 (-)<br>// 100.0 //<br>p13   |                           | 0.8<br>8      | 0.002 | ring finger<br>protein 152                             |
| 1376731<br>_at | ---     | Rn.201<br>834 | chr13:11667<br>148-<br>11668111 (-)<br>// 67.4 // p13       |                           | -<br>0.6<br>7 | 0.020 | ---                                                    |
| 1391552<br>_at | ---     | Rn.251<br>89  | chr13:30916<br>626-<br>30917344<br>(+) // 97.42 //<br>q11   |                           | -<br>0.9<br>3 | 0.003 | ---                                                    |
| 1391757<br>_at | ---     | Rn.253<br>28  | chr13:32435<br>090-<br>32435651 (-)<br>// 97.91 //<br>q11   |                           | -<br>0.6<br>6 | 0.032 | ---                                                    |
| 1388219<br>_at | Htr5b   | Rn.202<br>942 | chr13:33545<br>127-<br>33558050 (-)<br>// 88.44 //<br>q11   | cong<br>enic<br>Line<br>5 | 1.5<br>7      | 0.000 | 5-<br>hydroxytryptami<br>ne (serotonin)<br>receptor 5B |
| 1371099<br>_at | ---     | Rn.107<br>069 | chr13:43785<br>844-<br>43805288<br>(+) // 64.51 //<br>q13   | cong<br>enic<br>Line<br>5 | -<br>0.6<br>3 | 0.043 | ---                                                    |
| 1378831        | ---     | Rn.207        | chr13:44448                                                 | cong                      | -             | 0.005 | ---                                                    |

|            |        |               |                                                   |                           |               |       |                                                           |
|------------|--------|---------------|---------------------------------------------------|---------------------------|---------------|-------|-----------------------------------------------------------|
| _at        |        | 934           | 493-44448945 (-)<br>// 92.46 //<br>q13            | enic<br>Line<br>5         | 0.8<br>2      |       |                                                           |
| 1397746_at | ---    | Rn.212<br>168 | chr13:45195611-45195996<br>(+) // 72.51 //<br>q13 | cong<br>enic<br>Line<br>5 | -<br>0.6<br>8 | 0.018 | ---                                                       |
| 1391601_at | Lrrn2  | Rn.118<br>47  | chr13:45837783-45838309<br>(+) // 100.0 //<br>q13 | cong<br>enic<br>Line<br>9 | -<br>0.8<br>4 | 0.004 | leucine rich<br>repeat neuronal<br>2                      |
| 1391143_at | ---    | Rn.208<br>076 | chr13:46200201-46200743<br>(+) // 80.51 //<br>q13 | cong<br>enic<br>Line<br>9 | 1.1<br>0      | 0.001 | ---                                                       |
| 1398516_at | Golt1a | Rn.132<br>07  | chr13:46224432-46237119<br>(+) // 100.0 //<br>q13 | cong<br>enic<br>Line<br>9 | 1.2<br>0      | 0.001 | golgi transport 1<br>homolog A (S.<br>cerevisiae)         |
| 1386994_at | Btg2   | Rn.279<br>23  | chr13:47026963-47030745 (-)<br>// 99.88 //<br>q13 | cong<br>enic<br>Line<br>9 | 0.7<br>7      | 0.041 | B-cell<br>translocation<br>gene 2, anti-<br>proliferative |
| 1381796_at | ---    | Rn.205<br>091 | chr13:47509958-47510284<br>(+) // 48.24 //<br>q13 | cong<br>enic<br>Line<br>9 | -<br>0.8<br>2 | 0.004 | ---                                                       |
| 1382152_at | Kdm5b  | Rn.228<br>66  | chr13:47575639-47576287<br>(+) // 99.23 //<br>q13 | cong<br>enic<br>Line<br>9 | -<br>0.6<br>5 | 0.033 | lysine (K)-<br>specific<br>demethylase 5B                 |
| 1374123_at | ---    | Rn.250<br>48  | chr13:47945366-47946010 (-)<br>// 100.0 //<br>q13 | cong<br>enic<br>Line<br>9 | 1.9<br>0      | 0.000 | ---                                                       |
| 1389619_at | ---    | Rn.161<br>322 | chr13:48378300-                                   | cong<br>enic              | -<br>0.6      | 0.030 | ---                                                       |

|                |         |               |                                                           |                            |               |       |                                                                         |
|----------------|---------|---------------|-----------------------------------------------------------|----------------------------|---------------|-------|-------------------------------------------------------------------------|
|                |         |               | 48378952 (-)<br>// 81.9 // q13                            | Line<br>9                  | 4             |       |                                                                         |
| 1377301<br>_at | ---     | Rn.161<br>322 | chr13:48378<br>890-<br>48379420 (-)<br>// 83.74 //<br>q13 | cong<br>enic<br>Line<br>9  | -<br>0.8<br>8 | 0.004 | ---                                                                     |
| 1379398<br>_at | ---     | Rn.172<br>72  | chr13:52526<br>134-<br>52526731<br>(+) // 52.37 //<br>q13 |                            | -<br>0.8<br>9 | 0.003 | ---                                                                     |
| 1393159<br>_at | ---     | Rn.204<br>157 | chr13:57581<br>389-<br>57582128 (-)<br>// 95.81 //<br>q21 |                            | -<br>0.8<br>1 | 0.006 | ---                                                                     |
| 1386594<br>_at | ---     | Rn.204<br>157 | chr13:57582<br>015-<br>57582424 (-)<br>// 97.56 //<br>q21 |                            | -<br>0.9<br>9 | 0.003 | ---                                                                     |
| 1382368<br>_at | Trove2  | Rn.146<br>598 | chr13:57584<br>586-<br>57585024 (-)<br>// 65.13 //<br>q21 |                            | -<br>0.6<br>5 | 0.042 | TROVE domain<br>family, member<br>2                                     |
| 1398540<br>_at | Rgs1    | Rn.147<br>87  | chr13:58121<br>195-<br>58121856 (-)<br>// 99.1 // q21     |                            | 0.6<br>5      | 0.029 | regulator of G-<br>protein signaling<br>1                               |
| 1387566<br>_at | Pla2g4a | Rn.101<br>62  | chr13:64135<br>723-<br>64280803 (-)<br>// 97.69 //<br>q21 |                            | -<br>0.6<br>3 | 0.045 | phospholipase<br>A2, group IVA<br>(cytosolic,<br>calcium-<br>dependent) |
| 1368527<br>_at | Ptgs2   | Rn.443<br>69  | chr13:64427<br>165-<br>64435400<br>(+) // 95.46 //<br>q21 |                            | 0.5<br>4      | 0.045 | prostaglandin-<br>endoperoxide<br>synthase 2                            |
| 1379340<br>_at | Lamc2   | Rn.927<br>8   | chr13:68151<br>073-<br>68152288 (-)<br>// 89.33 //<br>q21 | cong<br>enic<br>Line<br>26 | 0.6<br>1      | 0.039 | laminin, gamma<br>2                                                     |



|                |                  |               |                                                           |                            |               |       |                                                  |
|----------------|------------------|---------------|-----------------------------------------------------------|----------------------------|---------------|-------|--------------------------------------------------|
| 1379889<br>_at | Lamc2            | Rn.927<br>8   | chr13:68155<br>279-<br>68159154 (-)<br>// 97.59 //<br>q21 | cong<br>enic<br>Line<br>26 | 0.5<br>8      | 0.043 | laminin, gamma<br>2                              |
| 1396877<br>_at | ---              | Rn.204<br>402 | chr13:68362<br>089-<br>68362554 (-)<br>// 50.31 //<br>q21 | cong<br>enic<br>Line<br>26 | 2.0<br>0      | 0.000 | ---                                              |
| 1373777<br>_at | ---              | Rn.114<br>1   | chr13:68812<br>523-<br>68812911<br>(+) // 91.29 //<br>q21 | cong<br>enic<br>Line<br>26 | 0.6<br>6      | 0.020 | ---                                              |
| 1389775<br>_at | ---              | ---           | chr13:70179<br>712-<br>70180139 (-)<br>// 95.29 //<br>q21 | cong<br>enic<br>Line<br>26 | 0.8<br>2      | 0.003 | ---                                              |
| 1377899<br>_at | RGD1304<br>982   | Rn.198<br>952 | chr13:72755<br>982-<br>72756590<br>(+) // 20.13 //<br>q22 | cong<br>enic<br>Line<br>26 | 0.7<br>0      | 0.024 | similar to RIKEN<br>cDNA<br>2810025M15           |
| 1377675<br>_at | LOC1003<br>02372 | ---           | chr13:75494<br>982-<br>75495823<br>(+) // 82.16 //<br>q22 | cong<br>enic<br>Line<br>26 | -<br>0.6<br>9 | 0.025 | hypothetical<br>protein<br>LOC100302372          |
| 1398475<br>_at | Dars2            | Rn.137<br>838 | chr13:76602<br>121-<br>76602835 (-)<br>// 53.78 //<br>q22 | cong<br>enic<br>Line<br>26 | -<br>0.6<br>4 | 0.030 | aspartyl-tRNA<br>synthetase 2<br>(mitochondrial) |
| 1395471<br>_at | ---              | Rn.341<br>02  | chr13:76743<br>684-<br>76744061<br>(+) // 95.69 //<br>q22 | cong<br>enic<br>Line<br>26 | 0.6<br>9      | 0.011 | ---                                              |
| 1374462<br>_at | Kifap3           | Rn.163<br>223 | chr13:79672<br>432-<br>79673772<br>(+) // 99.85 //<br>q22 |                            | -<br>0.6<br>1 | 0.046 | kinesin-<br>associated<br>protein 3              |
| 1374320        | F5               | Rn.829        | chr13:79992                                               |                            | -             | 0.000 | coagulation                                      |

|              |        |               |                                             |  |               |       |                                                 |
|--------------|--------|---------------|---------------------------------------------|--|---------------|-------|-------------------------------------------------|
| _at          |        | 10            | 843-79997293 (+) // 97.52 // q22            |  | 1.5<br>7      |       | factor V (proaccelerin, labile factor)          |
| 1373947_at   | Dpt    | Rn.839<br>6   | chr13:80574810-80590528 (+) // 99.6 // q23  |  | -<br>0.6<br>4 | 0.031 | dermatopontin                                   |
| 1377807_a_at | lqwd1  | Rn.391<br>7   | chr13:81082255-81082601 (+) // 94.79 // q23 |  | -<br>0.6<br>8 | 0.031 | IQ motif and WD repeats 1                       |
| 1390852_x_at | lqwd1  | Rn.391<br>7   | chr13:81082255-81082601 (+) // 94.79 // q23 |  | -<br>0.6<br>8 | 0.035 | IQ motif and WD repeats 1                       |
| 1375428_at   | Creg1  | Rn.805<br>1   | chr13:81491321-81502708 (+) // 98.73 // q23 |  | -<br>1.5<br>1 | 0.000 | cellular repressor of E1A-stimulated genes 1    |
| 1370995_at   | Pou2f1 | Rn.463<br>06  | chr13:81607332-81646888 (-) // 99.4 // q23  |  | -<br>1.3<br>2 | 0.000 | POU domain, class 2, transcription factor 1     |
| 1373523_at   | Fcgr3a | Rn.239<br>77  | chr13:86873777-86877669 (+) // 99.75 // q24 |  | 0.8<br>1      | 0.003 | Fc fragment of IgG, low affinity IIIa, receptor |
| 1393730_at   | ---    | Rn.150<br>301 | chr13:87151340-87151783 (+) // 59.14 // q24 |  | 0.7<br>4      | 0.009 | ---                                             |
| 1393551_at   | ---    | Rn.131<br>538 | chr13:87345603-87346258 (+) // 100.0 // q24 |  | 0.6<br>6      | 0.037 | ---                                             |
| 1391561_at   | ---    | Rn.285<br>53  | chr13:93976176-93977036 (-)                 |  | -<br>1.3<br>5 | 0.000 | ---                                             |

|                |         |              |                                                           |               |       |                                                                                                   |  |
|----------------|---------|--------------|-----------------------------------------------------------|---------------|-------|---------------------------------------------------------------------------------------------------|--|
|                |         |              | // 95.41 //<br>q26                                        |               |       |                                                                                                   |  |
| 1398390<br>_at | Cxcl13  | Rn.691<br>7  | chr14:15126<br>331-<br>15126759 (-)<br>// 95.32 //<br>p22 | 1.1<br>8      | 0.000 | chemokine (C-<br>X-C motif)<br>ligand 13                                                          |  |
| 1379365<br>_at | Cxcl11  | Rn.136<br>64 | chr14:17252<br>699-<br>17253487<br>(+) // 100.0 //<br>p22 | 0.9<br>3      | 0.002 | chemokine (C-<br>X-C motif)<br>ligand 11                                                          |  |
| 1368760<br>_at | Cxcl2   | Rn.102<br>30 | chr14:18677<br>128-<br>18679175 (-)<br>// 93.82 //<br>p22 | 0.8<br>3      | 0.003 | chemokine (C-<br>X-C motif)<br>ligand 2                                                           |  |
| 1387316<br>_at | Cxcl1   | Rn.109<br>07 | chr14:18690<br>338-<br>18692118 (-)<br>// 91.01 //<br>p22 | 1.4<br>7      | 0.002 | chemokine (C-<br>X-C motif)<br>ligand 1<br>(melanoma<br>growth<br>stimulating<br>activity, alpha) |  |
| 1383163<br>_at | Igj     | Rn.178<br>04 | chr14:21126<br>209-<br>21126678<br>(+) // 80.98 //<br>p22 | 0.5<br>8      | 0.040 | immunoglobulin<br>joining chain                                                                   |  |
| 1367816<br>_at | Hopx    | Rn.298<br>9  | chr14:33369<br>052-<br>33377951<br>(+) // 97.64 //<br>p11 | 0.6<br>4      | 0.035 | HOP homeobox                                                                                      |  |
| 1368168<br>_at | Slc34a2 | Rn.169<br>33 | chr14:62659<br>554-<br>62671676 (-)<br>// 95.65 //<br>q11 | 0.8<br>1      | 0.003 | solute carrier<br>family 34<br>(sodium<br>phosphate),<br>member 2                                 |  |
| 1386865<br>_at | Sparcl1 | Rn.309<br>1  | chr14:67663<br>46-6797580<br>(+) // 97.57 //<br>p22       | -<br>0.6<br>7 | 0.030 | SPARC-like 1<br>(hevin)                                                                           |  |
| 1379903<br>_at | ---     | Rn.988<br>31 | chr14:79415<br>489-<br>79416111 (-)                       | 0.7<br>3      | 0.005 | ---                                                                                               |  |

|                  |        |               |                                                               |               |       |                                        |  |
|------------------|--------|---------------|---------------------------------------------------------------|---------------|-------|----------------------------------------|--|
|                  |        |               | // 99.68 //<br>q21                                            |               |       |                                        |  |
| 1372301<br>_at   | Aebp1  | Rn.371<br>57  | chr14:86533<br>927-<br>86535668<br>(+) // 91.65 //<br>q21     | 0.6<br>5      | 0.031 | AE binding<br>protein 1                |  |
| 1383772<br>_at   | ---    | Rn.165<br>369 | chr15:39850<br>675-<br>39851364<br>(+) // 83.33 //<br>p12     | -<br>0.6<br>2 | 0.028 | ---                                    |  |
| 1378140<br>_at   | Arl11  | Rn.230<br>90  | chr15:40460<br>318-<br>40460922<br>(+) // 99.5 //<br>p12      | 0.6<br>2      | 0.041 | ADP-<br>ribosylation<br>factor-like 11 |  |
| 1391462<br>_at   | Ebpl   | Rn.999<br>55  | chr15:40484<br>463-<br>40485990 (-)<br>// 91.4 // p12         | 0.6<br>4      | 0.025 | emopamil<br>binding protein-<br>like   |  |
| 1382458<br>_at   | ---    | Rn.169<br>353 | chr15:40759<br>937-<br>40760437<br>(+) // 65.7 //<br>p12      | -<br>0.6<br>8 | 0.026 | ---                                    |  |
| 1392791<br>_at   | ---    | Rn.203<br>676 | chr15:50481<br>649-<br>50482555<br>(+) // 96.8 //<br>p11      | 0.7<br>3      | 0.013 | ---                                    |  |
| 1384509<br>_s_at | Pcdh17 | Rn.198<br>988 | chr15:66481<br>665-<br>66482028<br>(+) // 85.08 //<br>q12     | -<br>0.8<br>7 | 0.003 | protocadherin<br>17                    |  |
| 1393454<br>_at   | Pcdh17 | Rn.198<br>988 | chr15:66481<br>665-<br>66482028<br>(+) // 85.08 //<br>q12     | -<br>0.6<br>6 | 0.031 | protocadherin<br>17                    |  |
| 1375726<br>_at   | Lmo7   | Rn.984<br>17  | chr15:85920<br>179-<br>85928553<br>(+) // 99.71 //<br>q21 /// | -<br>0.7<br>1 | 0.025 | LIM domain 7                           |  |

|                  |               |               |                                                             |  |               |       |                                                   |
|------------------|---------------|---------------|-------------------------------------------------------------|--|---------------|-------|---------------------------------------------------|
|                  |               |               | chr20:12743<br>70-1275048<br>(-) // 96.91 //<br>p12         |  |               |       |                                                   |
| 1372809<br>_at   | LOC2905<br>95 | Rn.103<br>148 | chr16:13308<br>803-<br>13316409 (-)<br>// 95.97 //<br>p14   |  | 1.0<br>2      | 0.002 | hypothetical<br>gene supported<br>by AF152002     |
| 1392054<br>_at   | Pbrm1         | Rn.193<br>14  | chr16:65471<br>96-6547698<br>(+) // 86.02 //<br>p16         |  | -<br>0.7<br>5 | 0.031 | polybromo 1                                       |
| 1383266<br>_at   | Sfrp1         | Rn.163<br>333 | chr16:73030<br>854-<br>73031909 (-)<br>// 93.34 //<br>q12.5 |  | 0.6<br>0      | 0.041 | secreted<br>frizzled-related<br>protein 1         |
| 1385025<br>_a_at | Gpr137b       | Rn.604<br>53  | chr17:67000<br>798-<br>67004339<br>(+) // 99.81 //<br>q12.1 |  | 0.8<br>3      | 0.002 | G protein-<br>coupled<br>receptor 137B            |
| 1393148<br>_at   | Gpr137b       | Rn.604<br>53  | chr17:67000<br>855-<br>67006473<br>(+) // 99.84 //<br>q12.1 |  | 0.7<br>4      | 0.004 | G protein-<br>coupled<br>receptor 137B            |
| 1384747<br>_at   | Gpr137b       | Rn.604<br>53  | chr17:67006<br>941-<br>67007441<br>(+) // 99.4 //<br>q12.1  |  | 0.9<br>1      | 0.002 | G protein-<br>coupled<br>receptor 137B            |
| 1380418<br>_at   | ---           | Rn.209<br>714 | chr17:86152<br>733-<br>86152909 (-)<br>// 41.87 //<br>q12.3 |  | -<br>0.9<br>6 | 0.003 | ---                                               |
| 1379423<br>_at   | Rsu1          | Rn.114<br>53  | chr17:87345<br>488-<br>87345935<br>(+) // 96.1 //<br>q12.3  |  | -<br>0.9<br>5 | 0.002 | Ras suppressor<br>protein 1                       |
| 1392953<br>_at   | Ptpla         | Rn.383<br>34  | chr17:88239<br>566-<br>88243637 (-)                         |  | 1.1<br>0      | 0.001 | protein tyrosine<br>phosphatase-<br>like (proline |

|                  |        |               |                                                             |  |               |       |                                                                                                        |
|------------------|--------|---------------|-------------------------------------------------------------|--|---------------|-------|--------------------------------------------------------------------------------------------------------|
|                  |        |               | // 92.97 //<br>q12.3                                        |  |               |       | instead of<br>catalytic<br>arginine),<br>member a                                                      |
| 1383696<br>_at   | Ptpla  | Rn.383<br>34  | chr17:88253<br>097-<br>88253571 (-)<br>// 100.0 //<br>q12.3 |  | 1.0<br>3      | 0.002 | protein tyrosine<br>phosphatase-<br>like (proline<br>instead of<br>catalytic<br>arginine),<br>member a |
| 1368810<br>_a_at | Mbp    | Rn.632<br>85  | chr18:79025<br>625-<br>79057329<br>(+) // 99.95 //<br>q12.3 |  | -<br>0.5<br>5 | 0.032 | myelin basic<br>protein                                                                                |
| 1370080<br>_at   | Hmox1  | Rn.316<br>0   | chr19:13963<br>136-<br>13969960<br>(+) // 99.94 //<br>p11   |  | 0.9<br>6      | 0.003 | heme<br>oxygenase<br>(decycling) 1                                                                     |
| 1388722<br>_at   | Dnajb1 | Rn.128<br>947 | chr19:26213<br>753-<br>26214684 (-)<br>// 90.47 //<br>q11   |  | 0.6<br>4      | 0.046 | DnaJ (Hsp40)<br>homolog,<br>subfamily B,<br>member 1                                                   |
| 1383302<br>_at   | Dnajb1 | Rn.128<br>947 | chr19:26214<br>668-<br>26215653 (-)<br>// 97.57 //<br>q11   |  | 0.7<br>5      | 0.025 | DnaJ (Hsp40)<br>homolog,<br>subfamily B,<br>member 1                                                   |
| 1392566<br>_at   | ---    | Rn.203<br>180 | chr19:45857<br>968-<br>45858621<br>(+) // 95.18 //<br>q12   |  | 0.6<br>2      | 0.026 | ---                                                                                                    |
| 1387280<br>_a_at | Slc7a5 | Rn.322<br>61  | chr19:52120<br>725-<br>52149332 (-)<br>// 99.77 //<br>q12   |  | 0.6<br>3      | 0.030 | solute carrier<br>family 7<br>(cationic amino<br>acid transporter,<br>y+ system),<br>member 5          |
| 1368420<br>_at   | Cp     | Rn.327<br>77  | chr2:105086<br>277-<br>105135381<br>(+) // 98.85 //         |  | 0.6<br>1      | 0.041 | ceruloplasmin                                                                                          |

|                |                  |               |                                                            |               |       |                                                   |  |
|----------------|------------------|---------------|------------------------------------------------------------|---------------|-------|---------------------------------------------------|--|
|                |                  |               | q24                                                        |               |       |                                                   |  |
| 1384824<br>_at | Pcdh18           | Rn.611<br>15  | chr2:138615<br>285-<br>138615985<br>(-) // 98.72 //<br>q26 | -<br>0.6<br>2 | 0.036 | protocadherin<br>18                               |  |
| 1390656<br>_at | ---              | Rn.161<br>410 | chr2:153117<br>890-<br>153118435<br>(+) // 99.82 //<br>q31 | -<br>0.6<br>0 | 0.045 | ---                                               |  |
| 1387349<br>_at | Shox2            | Rn.112<br>58  | chr2:156881<br>043-<br>156889657<br>(-) // 97.27 //<br>q31 | 0.6<br>5      | 0.030 | short stature<br>homeobox 2                       |  |
| 1383008<br>_at | Smc4             | Rn.163<br>695 | chr2:158998<br>991-<br>159001274<br>(+) // 100.0 //<br>q31 | -<br>0.7<br>2 | 0.023 | structural<br>maintenance of<br>chromosomes 4     |  |
| 1367846<br>_at | S100a4           | Rn.504        | chr2:182885<br>069-<br>182887483<br>(+) // 99.83 //<br>q34 | 0.7<br>6      | 0.005 | S100 calcium-<br>binding protein<br>A4            |  |
| 1396194<br>_at | ---              | Rn.543<br>05  | chr2:191086<br>479-<br>191086904<br>(+) // 72.62 //<br>q34 | -<br>0.6<br>2 | 0.039 | ---                                               |  |
| 1371924<br>_at | Olfml3           | Rn.106<br>761 | chr2:198958<br>478-<br>198959336<br>(-) // 93.3 //<br>q34  | 0.6<br>0      | 0.048 | olfactomedin-<br>like 3                           |  |
| 1382193<br>_at | Cisd2            | Rn.248<br>58  | chr2:232903<br>676-<br>232904157<br>(-) // 96.18 //<br>q43 | -<br>0.7<br>2 | 0.014 | CDGSH iron<br>sulfur domain 2                     |  |
| 1383291<br>_at | C7 ///<br>Tubb2c | Rn.337<br>87  | chr2:541463<br>00-<br>54147392 (-)<br>// 99.82 //<br>q16   | 0.6<br>1      | 0.035 | complement<br>component 7 ///<br>tubulin, beta 2c |  |

|            |                       |           |                                                                                           |      |       |                                                                                          |                                                                                                                                                                                |
|------------|-----------------------|-----------|-------------------------------------------------------------------------------------------|------|-------|------------------------------------------------------------------------------------------|--------------------------------------------------------------------------------------------------------------------------------------------------------------------------------|
| 1391587_at | ---                   | Rn.16809  | chr2:77392335-77392908 (+) // 52.53 // q22                                                | -    | 1.36  | 0.000                                                                                    | ---                                                                                                                                                                            |
| 1373990_at | LOC361914 /// Slc7a12 | Rn.34357  | chr2:88620186-88620706 (-) // 54.53 // q23 /// chr2:88429242-88429760 (-) // 53.77 // q23 | -    | 0.69  | 0.033                                                                                    | similar to solute carrier family 7 (cationic amino acid transporter, y+ system), member 12 /// solute carrier family 7 (cationic amino acid transporter, y+ system), member 12 |
| 1372426_at | Adamtsl4              | Rn.62115  | chr2_random:2876879-2877369 (+) // 94.23 //                                               | 0.63 | 0.039 | ADAMTS-like 4                                                                            |                                                                                                                                                                                |
| 1386903_at | S100b                 | Rn.8937   | chr20:12791436-12824508 (-) // 99.46 // p12                                               | 0.61 | 0.041 | S100 calcium binding protein B                                                           |                                                                                                                                                                                |
| 1370157_at | Pln                   | Rn.9740   | chr20:32000370-32008915 (+) // 95.3 // q11                                                | 0.63 | 0.030 | phospholamban                                                                            |                                                                                                                                                                                |
| 1370186_at | Psmb9                 | Rn.13686  | chr20:4801219-4806608 (+) // 93.3 // p12                                                  | 0.65 | 0.024 | proteasome (prosome, macropain) subunit, beta type 9 (large multifunctional peptidase 2) |                                                                                                                                                                                |
| 1396184_at | ---                   | Rn.171910 | chr20:6216552-6216994 (-) // 96.08 // p12                                                 | -    | 0.63  | 0.028                                                                                    | ---                                                                                                                                                                            |
| 1392547_at | MGC105649             | Rn.106101 | chr3:109610058-109613034 (+) // 99.57 //                                                  | 0.58 | 0.048 | hypothetical LOC302884                                                                   |                                                                                                                                                                                |



|                  |          |               |                                                            |  |               |       |                                                                |
|------------------|----------|---------------|------------------------------------------------------------|--|---------------|-------|----------------------------------------------------------------|
|                  |          |               | q35                                                        |  |               |       |                                                                |
| 1387011<br>_at   | Lcn2     | Rn.113<br>03  | chr3:115113<br>97-<br>11514747 (-)<br>// 100.0 //<br>p11   |  | 0.9<br>1      | 0.003 | lipocalin 2                                                    |
| 1376513<br>_a_at | ---      | Rn.125<br>774 | chr3:115976<br>134-<br>116033752<br>(-) // 96.8 //<br>q36  |  | 0.5<br>9      | 0.041 | ---                                                            |
| 1372729<br>_at   | Procr    | Rn.144<br>312 | chr3:146272<br>738-<br>146273764<br>(+) // 64.84 //<br>q42 |  | 0.5<br>9      | 0.045 | protein C<br>receptor,<br>endothelial                          |
| 1392969<br>_at   | ---      | Rn.122<br>38  | chr3:154485<br>187-<br>154485651<br>(+) // 94.89 //<br>q42 |  | -<br>0.5<br>4 | 0.004 | ---                                                            |
| 1372264<br>_at   | Pck1     | Rn.104<br>376 | chr3:164017<br>885-<br>164018347<br>(+) // 74.9 //<br>q42  |  | -<br>0.5<br>3 | 0.000 | phosphoenolpyr<br>uvate<br>carboxykinase 1<br>(soluble)        |
| 1379058<br>_at   | ---      | Rn.585<br>4   | chr3:171302<br>84-<br>17130625<br>(+) // 88.31 //<br>q11   |  | -<br>0.7<br>2 | 0.030 | ---                                                            |
| 1387382<br>_at   | Hnmt     | Rn.131<br>45  | chr3:205759<br>4-2090011 (-)<br>// 94.09 //<br>p13         |  | -<br>0.8<br>2 | 0.006 | histamine N-<br>methyltransferas<br>e                          |
| 1381575<br>_at   | Neb      | Rn.134<br>031 | chr3:336344<br>32-<br>33634813 (-)<br>// 100.0 //<br>q12   |  | -<br>0.6<br>0 | 0.033 | nebulin                                                        |
| 1390672<br>_at   | Rprm     | Rn.451<br>97  | chr3:355901<br>61-<br>35590683 (-)<br>// 100.0 //<br>q12   |  | 0.6<br>5      | 0.036 | reprimin, TP53<br>dependent G2<br>arrest mediator<br>candidate |
| 1372254          | Serping1 | Rn.100        | chr3:679687                                                |  | 0.6           | 0.040 | serine (or                                                     |

|                  |                |               |                                                            |  |               |       |                                                                                                            |
|------------------|----------------|---------------|------------------------------------------------------------|--|---------------|-------|------------------------------------------------------------------------------------------------------------|
| _at              |                | 285           | 95-67973561 (-)<br>// 98.56 //<br>q24                      |  | 3             |       | cysteine)<br>peptidase<br>inhibitor, clade<br>G, member 1                                                  |
| 1387378<br>_at   | Fcnb           | Rn.482<br>81  | chr3:701093<br>4-7019366 (-)<br>// 99.58 //<br>p12         |  | 0.7<br>6      | 0.007 | ficolin B                                                                                                  |
| 1369008<br>_a_at | Olfm1          | Rn.110<br>05  | chr3:717042<br>0-7195345<br>(+) // 94.93 //<br>p12         |  | 0.7<br>3      | 0.009 | olfactomedin 1                                                                                             |
| 1394153<br>_at   | ---            | Rn.165<br>59  | chr4:120619<br>809-<br>120620211<br>(-) // 98.05 //<br>q34 |  | -<br>0.7<br>3 | 0.030 | ---                                                                                                        |
| 1367794<br>_at   | A2m            | Rn.109<br>457 | chr4:158103<br>688-<br>158153693<br>(+) // 98.55 //<br>q42 |  | 0.6<br>9      | 0.026 | alpha-2-<br>macroglobulin                                                                                  |
| 1382153<br>_at   | Clecsf6        | Rn.240<br>32  | chr4:159707<br>345-<br>159710266<br>(+) // 94.64 //<br>q42 |  | 0.6<br>6      | 0.031 | C-type (calcium<br>dependent,<br>carbohydrate<br>recognition<br>domain) lectin,<br>superfamily<br>member 6 |
| 1379205<br>_at   | ---            | Rn.148<br>149 | chr4:160710<br>031-<br>160710327<br>(+) // 93.91 //<br>q42 |  | 0.6<br>4      | 0.022 | ---                                                                                                        |
| 1373931<br>_at   | RGD1304<br>952 | Rn.134<br>11  | chr4:161123<br>258-<br>161123926<br>(+) // 84.73 //<br>q42 |  | 0.6<br>1      | 0.039 | similar to RIKEN<br>cDNA<br>C530028O21<br>gene                                                             |
| 1396811<br>_at   | ---            | ---           | chr4:163919<br>402-<br>163919750<br>(+) // 43.96 //<br>q42 |  | -<br>0.6<br>7 | 0.031 | ---                                                                                                        |
| 1398253<br>_at   | Kap            | Rn.111<br>43  | chr4:170652<br>192-                                        |  | -<br>0.5      | 0.008 | kidney androgen<br>regulated                                                                               |

|                |                |               |                                                            |  |               |       |                                                                     |
|----------------|----------------|---------------|------------------------------------------------------------|--|---------------|-------|---------------------------------------------------------------------|
|                |                |               | 170655239<br>(-) // 90.17 //<br>q43                        |  | 8             |       | protein                                                             |
| 1377340<br>_at | Tfpi2          | Rn.157<br>76  | chr4:288066<br>87-<br>28807196 (-)<br>// 100.0 //<br>q13   |  | 1.1<br>6      | 0.002 | tissue factor<br>pathway<br>inhibitor 2                             |
| 1375724<br>_at | RGD1563<br>612 | Rn.204<br>577 | chr4:336571<br>89-<br>33657917<br>(+) // 98.51 //<br>q21   |  | 0.9<br>8      | 0.003 | similar to<br>testhymin                                             |
| 1369191<br>_at | Il6            | Rn.987<br>3   | chr4:456798<br>-461376 (-) //<br>90.73 // q11              |  | 1.1<br>1      | 0.002 | interleukin 6                                                       |
| 1371691<br>_at | Rarres2        | Rn.285<br>32  | chr4:766595<br>06-<br>76662510 (-)<br>// 99.59 //<br>q24   |  | 0.7<br>3      | 0.010 | retinoic acid<br>receptor<br>responder<br>(tazarotene<br>induced) 2 |
| 1368187<br>_at | Gpnmb          | Rn.137<br>78  | chr4:771613<br>51-<br>77182624<br>(+) // 96.6 //<br>q24    |  | 0.7<br>3      | 0.009 | glycoprotein<br>(transmembrane<br>) nmb                             |
| 1378754<br>_at | ---            | Rn.161<br>96  | chr4:816169<br>63-<br>81617451<br>(+) // 98.16 //<br>q24   |  | 0.6<br>5      | 0.036 | ---                                                                 |
| 1392894<br>_at | Fgl2           | Rn.646<br>35  | chr4:917632<br>6-9177000 (-)<br>// 95.73 //<br>q11         |  | 0.6<br>2      | 0.050 | fibrinogen-like 2                                                   |
| 1383516<br>_at | Fgl2           | Rn.646<br>35  | chr4:917702<br>7-9177778 (-)<br>// 100.0 //<br>q11         |  | 0.6<br>2      | 0.040 | fibrinogen-like 2                                                   |
| 1368607<br>_at | Cyp4a8         | Rn.100<br>34  | chr5:135547<br>363-<br>135578186<br>(-) // 98.88 //<br>q36 |  | -<br>0.7<br>5 | 0.003 | cytochrome<br>P450, family 4,<br>subfamily a,<br>polypeptide 8      |
| 1384649<br>_at | ---            | ---           | chr5:136275<br>574-                                        |  | 0.6<br>1      | 0.040 | ---                                                                 |

|                  |         |               |                                                                                                                                                                                               |  |               |       |                                                     |
|------------------|---------|---------------|-----------------------------------------------------------------------------------------------------------------------------------------------------------------------------------------------|--|---------------|-------|-----------------------------------------------------|
|                  |         |               | 136276063<br>(-) // 42.74 //<br>q36                                                                                                                                                           |  |               |       |                                                     |
| 1368471<br>_at   | Guca2a  | Rn.113<br>88  | chr5:140227<br>305-<br>140229145<br>(+) // 97.88 //<br>q36                                                                                                                                    |  | 1.0<br>3      | 0.003 | guanylate<br>cyclase activator<br>2a (guanylin)     |
| 1387253<br>_at   | Guca2b  | Rn.975<br>93  | chr5:140237<br>183-<br>140239236<br>(-) // 80.12 //<br>q36                                                                                                                                    |  | 0.7<br>9      | 0.005 | guanylate<br>cyclase activator<br>2B                |
| 1370561<br>_at   | A3galt2 | Rn.377<br>37  | chr5:147981<br>008-<br>147994141<br>(+) // 99.74 //<br>q36                                                                                                                                    |  | 0.5<br>9      | 0.041 | alpha 1,3-<br>galactosyltransf<br>erase 2           |
| 1368006<br>_at   | Laptn5  | Rn.247<br>99  | chr5:149775<br>671-<br>149797167<br>(+) // 94.28 //<br>q36                                                                                                                                    |  | 0.8<br>8      | 0.002 | lysosomal<br>multispanning<br>membrane<br>protein 5 |
| 1380579<br>_at   | Matn1   | Rn.151<br>59  | chr5:149812<br>569-<br>149815428<br>(+) // 95.39 //<br>q36                                                                                                                                    |  | -<br>3.9<br>1 | 0.000 | matrilin 1,<br>cartilage matrix<br>protein          |
| 1374806<br>_at   | Sfn     | Rn.145<br>079 | chr5:151479<br>869-<br>151480392<br>(+) // 89.34 //<br>q36 ///<br>chr13:10750<br>8826-<br>107509347<br>(+) // 87.13 //<br>q27 ///<br>chr6:230954<br>17-<br>23095966 (-)<br>// 84.38 //<br>q13 |  | 0.7<br>3      | 0.016 | stratifin                                           |
| 1392265<br>_s_at | Mmp23   | Rn.225<br>62  | chr5:172486<br>915-<br>172487324                                                                                                                                                              |  | 0.6<br>4      | 0.027 | matrix<br>metallopeptidas<br>e 23                   |

|            |            |           |                                              |       |       |                                                                                 |  |
|------------|------------|-----------|----------------------------------------------|-------|-------|---------------------------------------------------------------------------------|--|
|            |            |           | (-) // 99.27 // q36                          |       |       |                                                                                 |  |
| 1382351_at | Gem        | Rn.40436  | chr5:26007476-26008270 (+) // 91.81 // q13   | 0.60  | 0.032 | GTP binding protein (gene overexpressed in skeletal muscle)                     |  |
| 1384770_at | ---        | Rn.147581 | chr5:28896913-28897334 (-) // 100.0 // q13   | -0.65 | 0.025 | ---                                                                             |  |
| 1384831_at | Slc7a13    | Rn.22708  | chr5:34437702-34438124 (+) // 50.94 // q13   | -0.83 | 0.018 | solute carrier family 7, (cationic amino acid transporter, y+ system) member 13 |  |
| 1394490_at | Abca1      | Rn.148916 | chr5:70491315-70492240 (-) // 99.25 // q24   | -0.67 | 0.039 | ATP-binding cassette, sub-family A (ABC1), member 1                             |  |
| 1395148_at | RGD1561090 | Rn.99077  | chr5:94069398-94069864 (+) // 85.23 // q31   | -0.73 | 0.011 | Similar to protein tyrosine phosphatase, receptor type, D                       |  |
| 1375653_at | ---        | Rn.203993 | chr6:113348113-113348784 (+) // 84.91 // q31 | 0.71  | 0.011 | ---                                                                             |  |
| 1382319_at | Gpr68      | Rn.16653  | chr6:125134282-125134697 (-) // 95.83 // q32 | 0.67  | 0.026 | G protein-coupled receptor 68                                                   |  |
| 1376845_at | isg12(b)   | Rn.22509  | chr6:127733539-127735008 (-) // 100.0 // q32 | 0.70  | 0.015 | putative ISG12(b) protein                                                       |  |
| 1372256_at | Crip       | Rn.8405   | chr6:138159129-138160959                     | 0.57  | 0.045 | cysteine-rich intestinal protein                                                |  |

|                |         |               |                                                         |               |       |                                                           |  |
|----------------|---------|---------------|---------------------------------------------------------|---------------|-------|-----------------------------------------------------------|--|
|                |         |               | (+) // 99.77 // q32                                     |               |       |                                                           |  |
| 1379636<br>_at | Fam82a  | Rn.253<br>65  | chr6:250727<br>9-2514576<br>(+) // 99.45 // q11         | -<br>0.6<br>3 | 0.041 | family with<br>sequence<br>similarity 82,<br>member A     |  |
| 1368440<br>_at | Slc3a1  | Rn.111<br>96  | chr6:838515<br>9-8419461<br>(+) // 97.98 // q12         | -<br>0.6<br>0 | 0.033 | solute carrier<br>family 3,<br>member 1                   |  |
| 1374070<br>_at | Gpx2    | Rn.350<br>3   | chr6:993724<br>17-<br>99376230 (-)<br>// 100.0 // q24   | 0.6<br>0      | 0.044 | glutathione<br>peroxidase 2                               |  |
| 1381533<br>_at | Rnd1    | Rn.198<br>250 | chr7:137418<br>519-<br>137418908<br>(-) // 100.0 // q36 | 0.9<br>9      | 0.003 | Rho family<br>GTPase 1                                    |  |
| 1387625<br>_at | Igfbp6  | Rn.643<br>1   | chr7:140885<br>387-<br>140890032<br>(+) // 90.0 // q36  | 0.5<br>9      | 0.048 | insulin-like<br>growth factor<br>binding protein 6        |  |
| 1368337<br>_at | Glycam1 | Rn.109<br>39  | chr7:142455<br>641-<br>142457903<br>(-) // 96.69 // q36 | 1.4<br>1      | 0.000 | glycosylation<br>dependent cell<br>adhesion<br>molecule 1 |  |
| 1388924<br>_at | Angptl4 | Rn.119<br>611 | chr7:162616<br>20-<br>16262022 (-)<br>// 89.33 // q12   | 0.7<br>6      | 0.026 | angiopoietin-like<br>4                                    |  |
| 1389018<br>_at | ---     | ---           | chr7:674934<br>50-<br>67494305<br>(+) // 97.39 // q22   | 0.5<br>9      | 0.037 | ---                                                       |  |
| 1368308<br>_at | Myc     | Rn.120<br>72  | chr7:989533<br>06-<br>98958042<br>(+) // 96.29 // q33   | 0.6<br>7      | 0.046 | myelocytomatos<br>is oncogene                             |  |
| 1375777        | ---     | Rn.202        | chr8:343471                                             | -             | 0.003 | ---                                                       |  |

|            |         |           |                                            |  |       |       |                                                 |
|------------|---------|-----------|--------------------------------------------|--|-------|-------|-------------------------------------------------|
| _at        |         | 475       | 74-34347793 (+) // 78.73 // q21            |  | 1.01  |       |                                                 |
| 1376198_at | Asam    | Rn.163013 | chr8:43766786-43767276 (+) // 95.87 // q22 |  | 0.61  | 0.030 | adipocyte-specific adhesion molecule            |
| 1381811_at | ---     | Rn.92548  | chr8:47077615-47077945 (+) // 99.1 // q22  |  | 0.64  | 0.041 | ---                                             |
| 1374013_at | C1qtnf5 | Rn.99884  | chr8:47090809-47091433 (+) // 100.0 // q22 |  | 0.64  | 0.035 | C1q and tumor necrosis factor related protein 5 |
| 1397225_at | ---     | Rn.170224 | chr8:51926554-51927008 (-) // 70.11 // q23 |  | 0.85  | 0.024 | ---                                             |
| 1380306_at | ---     | Rn.54177  | chr8:51928782-51929247 (-) // 85.07 // q23 |  | 1.03  | 0.009 | ---                                             |
| 1392613_at | ---     | Rn.166664 | chr8:51929265-51930063 (-) // 90.78 // q23 |  | 1.09  | 0.010 | ---                                             |
| 1390127_at | Dixdc1  | Rn.8331   | chr8:54018178-54019623 (-) // 71.0 // q23  |  | -0.66 | 0.034 | DIX domain containing 1                         |
| 1373839_at | Nope    | Rn.164673 | chr8:69383115-69383839 (+) // 99.86 // q24 |  | 0.79  | 0.006 | neighbor of Punc E11                            |
| 1379397_at | Rora    | Rn.43530  | chr8:73814004-73817765                     |  | -0.63 | 0.033 | RAR-related orphan receptor alpha               |

|                |        |               |                                                            |               |       |                                                                                                         |  |
|----------------|--------|---------------|------------------------------------------------------------|---------------|-------|---------------------------------------------------------------------------------------------------------|--|
|                |        |               | (+) // 100.0 //<br>q24                                     |               |       |                                                                                                         |  |
| 1370688<br>_at | Gclc   | Rn.836<br>5   | chr8:827244<br>56-<br>82762006<br>(+) // 99.95 //<br>q31   | -<br>0.7<br>3 | 0.021 | glutamate-<br>cysteine ligase,<br>catalytic subunit                                                     |  |
| 1379747<br>_at | Prss35 | Rn.161<br>916 | chr8:920241<br>43-<br>92024661 (-)<br>// 97.35 //<br>q31   | -<br>1.2<br>6 | 0.000 | Protease,<br>serine, 35                                                                                 |  |
| 1381768<br>_at | Mthfs  | Rn.221<br>5   | chr8:941059<br>01-<br>94106254<br>(+) // 99.43 //<br>q31   | 1.0<br>5      | 0.001 | 5,10-<br>methenyltetrahy<br>drofolate<br>synthetase (5-<br>formyltetrahydro<br>folate cyclo-<br>ligase) |  |
| 1392719<br>_at | Mthfs  | Rn.221<br>5   | chr8:941076<br>62-<br>94108310<br>(+) // 67.44 //<br>q31   | 0.7<br>6      | 0.003 | 5,10-<br>methenyltetrahy<br>drofolate<br>synthetase (5-<br>formyltetrahydro<br>folate cyclo-<br>ligase) |  |
| 1392702<br>_at | ---    | ---           | chr9:112684<br>763-<br>112685036<br>(+) // 35.36 //<br>q38 | 0.6<br>3      | 0.044 | ---                                                                                                     |  |
| 1368236<br>_at | Mep1a  | Rn.162<br>65  | chr9:131707<br>61-<br>13201094<br>(+) // 99.39 //<br>q12   | -<br>0.5<br>5 | 0.042 | meprin 1 alpha                                                                                          |  |
| 1393705<br>_at | ---    | Rn.339<br>33  | chr9:138892<br>68-<br>13889744<br>(+) // 96.53 //<br>q12   | -<br>3.1<br>9 | 0.000 | ---                                                                                                     |  |
| 1370959<br>_at | Col3a1 | Rn.324<br>7   | chr9:443073<br>38-<br>44317829<br>(+) // 98.4 //<br>q22    | 0.6<br>0      | 0.048 | collagen, type<br>III, alpha 1                                                                          |  |



|                |                                                                                                                         |               |                                                                                                                                                                                                                                                                                                                                         |               |       |                                                                                                                                                                                                                                                                                                                 |
|----------------|-------------------------------------------------------------------------------------------------------------------------|---------------|-----------------------------------------------------------------------------------------------------------------------------------------------------------------------------------------------------------------------------------------------------------------------------------------------------------------------------------------|---------------|-------|-----------------------------------------------------------------------------------------------------------------------------------------------------------------------------------------------------------------------------------------------------------------------------------------------------------------|
| 1382452<br>_at | Sdpr                                                                                                                    | Rn.203<br>035 | chr9:473730<br>43-<br>47373555 (-)<br>// 81.9 // q22                                                                                                                                                                                                                                                                                    | -<br>0.6<br>6 | 0.033 | serum<br>deprivation<br>response                                                                                                                                                                                                                                                                                |
| 1391152<br>_at | LOC3673<br>81 ///<br>LOC6802<br>81 ///<br>LOC6857<br>69 ///<br>LOC6905<br>76 ///<br>LOC6914<br>14 ///<br>RGD1563<br>862 | Rn.786<br>70  | chr9:579504<br>6-5795580<br>(+) // 79.3 //<br>q11 ///<br>chr9:567679<br>4-5677328<br>(+) // 75.27 //<br>q11 ///<br>chr9:575633<br>6-5756870<br>(+) // 75.27 //<br>q11 ///<br>chr9:553182<br>7-5532361<br>(+) // 75.09 //<br>q11 ///<br>chr9:556605<br>6-5566590<br>(+) // 74.54 //<br>q11 ///<br>chr9:571896<br>4-5719498<br>(+) // 74. | 0.5<br>6      | 0.049 | similar to RIKEN<br>cDNA<br>4930555G01 ///<br>similar to Discs<br>large homolog 5<br>(Placenta and<br>prostate DLG)<br>(Discs large<br>protein P-dlg) ///<br>similar to Discs<br>large homolog 5<br>(Placenta and<br>prostate DLG)<br>(Discs large<br>protein P-dlg) ///<br>similar to Discs<br>large homolog 5 |
| 1367600<br>_at | Des                                                                                                                     | Rn.391<br>96  | chr9:746376<br>66-<br>74645499<br>(+) // 98.92 //<br>q33                                                                                                                                                                                                                                                                                | 0.5<br>8      | 0.048 | desmin                                                                                                                                                                                                                                                                                                          |
| 1367712<br>_at | Timp1                                                                                                                   | Rn.257<br>54  | chrX:125424<br>80-<br>12547161 (-)<br>// 99.88 //<br>q12                                                                                                                                                                                                                                                                                | 0.8<br>5      | 0.003 | TIMP<br>metallopeptidas<br>e inhibitor 1                                                                                                                                                                                                                                                                        |
| 1391476<br>_at | ---                                                                                                                     | Rn.440<br>28  | chrX:138964<br>585-<br>138965630<br>(+) // 98.31 //<br>q36                                                                                                                                                                                                                                                                              | -<br>0.8<br>1 | 0.006 | ---                                                                                                                                                                                                                                                                                                             |
| 1368372<br>_at | Sts                                                                                                                     | Rn.631<br>2   | chrX:639158<br>02-<br>63923833<br>(+) // 99.15 //                                                                                                                                                                                                                                                                                       | 0.6<br>2      | 0.028 | steroid sulfatase                                                                                                                                                                                                                                                                                               |

**B. 8% NaCl diet for 7 days**

| ProbeSet ID  | Gene Symbol | UniGene ID | Alignments      | Congenic line | Log <sub>2</sub> R <sub>HS</sub> | RP-FDR <sub>HS</sub> | Gene Title                                     |
|--------------|-------------|------------|-----------------|---------------|----------------------------------|----------------------|------------------------------------------------|
| 1367948_a_at | Kdr         | Rn.88869   | ---             |               | -0.54                            | 0.045                | kinase insert domain protein receptor          |
| 1373401_at   | Tnc         | Rn.12723   | ---             |               | 0.77                             | 0.008                | Tenascin C                                     |
| 1373908_at   | ---         | ---        | ---             |               | 1.45                             | 0.000                | ---                                            |
| 1373921_at   | Echdc3      | Rn.202613  | ---             |               | -0.51                            | 0.048                | enoyl Coenzyme A hydratase domain containing 3 |
| 1379259_at   | ---         | Rn.146603  | ---             |               | -2.19                            | 0.000                | ---                                            |
| 1383665_at   | Lpin2       | Rn.203839  | ---             |               | -0.58                            | 0.029                | lipin 2                                        |
| 1384231_at   | LOC687121   | ---        | ---             |               | 0.77                             | 0.009                | similar to Shc SH2-domain binding protein 1    |
| 1387158_at   | Mep1b       | Rn.3520    | ---             |               | -0.99                            | 0.001                | mepirin 1 beta thymidine kinase 1, soluble     |
| 1389858_at   | Tk1         | Rn.217952  | ---             |               | 0.57                             | 0.045                |                                                |
| 1390722_at   | ---         | ---        | ---             |               | 1.86                             | 0.000                | ---                                            |
| 1396417_at   | ---         | Rn.153725  | ---             |               | -0.53                            | 0.038                | ---                                            |
| 1397577_at   | ---         | ---        | ---             |               | -0.57                            | 0.029                | ---                                            |
| 1371245_a_at | LOC689064   | ---        | chr1:161578125- |               | 1.03                             | 0.004                | beta-globin                                    |

|                  |        |               |                                                                                                                              |               |       |                                                                      |  |
|------------------|--------|---------------|------------------------------------------------------------------------------------------------------------------------------|---------------|-------|----------------------------------------------------------------------|--|
|                  |        |               | 161579489<br>(-) // 93.18 //<br>q32                                                                                          |               |       |                                                                      |  |
| 1367553<br>_x_at | Hbb    | Rn.202<br>945 | chr1:161584<br>855-<br>161620196<br>(-) // 90.7 //<br>q32 ///<br>chr1:161578<br>238-<br>161579551<br>(-) // 77.18 //<br>q32  | 0.7<br>1      | 0.018 | hemoglobin,<br>beta                                                  |  |
| 1373336<br>_at   | Gprc5b | Rn.473<br>30  | chr1:177206<br>414-<br>177206826<br>(-) // 88.89 //<br>q35                                                                   | -<br>0.6<br>9 | 0.004 | G protein-<br>coupled<br>receptor, family<br>C, group 5,<br>member B |  |
| 1370436<br>_at   | Acsn2  | Rn.148<br>75  | chr1:177830<br>612-<br>177869061<br>(+) // 96.46 //<br>q35                                                                   | -<br>0.9<br>7 | 0.002 | acyl-CoA<br>synthetase<br>medium-chain<br>family member 2            |  |
| 1370746<br>_at   | Prkacb | Rn.202<br>491 | chr1:186619<br>404-<br>186620435<br>(+) // 90.82 //<br>q36 ///<br>chr2:244949<br>302-<br>245035266<br>(-) // 99.91 //<br>q44 | 0.6<br>3      | 0.045 | protein kinase,<br>cAMP<br>dependent,<br>catalytic, beta             |  |
| 1389566<br>_at   | Ccnb2  | Rn.674<br>3   | chr1:205853<br>33-<br>20586031 (-)<br>// 96.67 //<br>p12 ///<br>chr8:748921<br>13-<br>74896194 (-)<br>// 96.81 //<br>q24     | 0.5<br>6      | 0.050 | cyclin B2                                                            |  |
| 1395634<br>_at   | ---    | Rn.168<br>253 | chr1:207360<br>231-<br>207360634                                                                                             | -<br>0.7<br>1 | 0.012 | ---                                                                  |  |

|            |          |           |                                              |       |       |                                                                       |
|------------|----------|-----------|----------------------------------------------|-------|-------|-----------------------------------------------------------------------|
|            |          |           | (+) // 52.57 // q42                          |       |       |                                                                       |
| 1396039_at | Slc22a12 | Rn.137035 | chr1:209320805-209321109 (-) // 50.86 // q43 | -0.57 | 0.041 | solute carrier family 22 (organic anion/urate transporter), member 12 |
| 1388172_at | Slc22a25 | Rn.31066  | chr1:211122125-211204306 (-) // 82.9 // q43  | -0.63 | 0.033 | solute carrier family 22, member 25                                   |
| 1378193_at | Ms4a7    | Rn.44037  | chr1:213828861-213835028 (-) // 99.08 // q43 | 0.59  | 0.049 | membrane-spanning 4-domains, subfamily A, member 7                    |
| 1369427_at | Mpeg1    | Rn.162497 | chr1:215387911-215390172 (+) // 99.55 // q43 | 0.80  | 0.009 | macrophage expressed gene 1                                           |
| 1371970_at | Fam111a  | Rn.112856 | chr1:215596336-215597225 (+) // 99.89 // q43 | 0.53  | 0.049 | family with sequence similarity 111, member A                         |
| 1389581_at | Il33     | Rn.106849 | chr1:233681966-233684615 (+) // 100.0 // q52 | 0.71  | 0.015 | interleukin 33                                                        |
| 1373970_at | Il33     | Rn.106849 | chr1:233684782-233685804 (+) // 98.17 // q52 | 0.66  | 0.023 | interleukin 33                                                        |
| 1380775_at | Kif20b   | Rn.208134 | chr1:238943389-238947659 (+) // 92.21 // q52 | 0.59  | 0.036 | kinesin family member 20B                                             |
| 1385619_at | Kif11    | Rn.58850  | chr1:241717842-241721610                     | 0.58  | 0.036 | kinesin family member 11                                              |

|                  |                                                       |               |                                                                                                                          |               |       |                                                                                                                          |
|------------------|-------------------------------------------------------|---------------|--------------------------------------------------------------------------------------------------------------------------|---------------|-------|--------------------------------------------------------------------------------------------------------------------------|
|                  |                                                       |               | (+) // 100.0 //<br>q53                                                                                                   |               |       |                                                                                                                          |
| 1390891<br>_at   | Kif11                                                 | Rn.588<br>50  | chr1:241722<br>204-<br>241722847<br>(+) // 78.07 //<br>q53                                                               | 0.5<br>5      | 0.041 | kinesin family<br>member 11                                                                                              |
| 1375475<br>_at   | ---                                                   | Rn.208<br>145 | chr1:259756<br>929-<br>259757430<br>(+) // 95.19 //<br>q55                                                               | 0.6<br>0      | 0.020 | ---                                                                                                                      |
| 1391518<br>_at   | LOC6893<br>99                                         | Rn.51         | chr1:282726<br>69-<br>28273208<br>(+) // 59.96 //<br>p11 ///<br>chrX:763435<br>79-<br>76344119<br>(+) // 89.94 //<br>q22 | 0.5<br>7      | 0.039 | hypothetical<br>protein<br>LOC689399                                                                                     |
| 1374726<br>_at   | Fndc1                                                 | Rn.206<br>33  | chr1:415833<br>22-<br>41584011<br>(+) // 91.51 //<br>q11                                                                 | 0.6<br>6      | 0.018 | fibronectin type<br>III domain<br>containing 1                                                                           |
| 1387303<br>_at   | Slc22a2                                               | Rn.105<br>55  | chr1:423956<br>73-<br>42442837 (-)<br>// 97.9 // q11                                                                     | -<br>0.7<br>8 | 0.004 | solute carrier<br>family 22<br>(organic cation<br>transporter),<br>member 2                                              |
| 1388036<br>_a_at | Mllt4                                                 | Rn.58         | chr1:488276<br>86-<br>48903967<br>(+) // 68.36 //<br>q12                                                                 | 0.6<br>7      | 0.015 | myeloid/lymphoi<br>d or mixed-<br>lineage<br>leukemia<br>(trithorax<br>homolog,<br>Drosophila);<br>translocated to,<br>4 |
| 1370493<br>_a_at | Lilrb3l ///<br>LOC6834<br>46 ///<br>LOC6909<br>48 /// | Rn.198<br>480 | chr1:636774<br>85-<br>63735563<br>(+) // 99.24 //<br>q12 ///                                                             | 0.8<br>0      | 0.008 | leukocyte<br>immunoglobulin-<br>like receptor,<br>subfamily B<br>(with TM and                                            |

|                |                                     |               |                                                                                                                     |  |               |       |                                                                                                                                                                                                                                  |
|----------------|-------------------------------------|---------------|---------------------------------------------------------------------------------------------------------------------|--|---------------|-------|----------------------------------------------------------------------------------------------------------------------------------------------------------------------------------------------------------------------------------|
|                | LOC6909<br>55 ///<br>RGD1562<br>625 |               | chr1:637704<br>67-<br>63777226<br>(+) // 94.2 //<br>q12                                                             |  |               |       | ITIM domains),<br>member 3-like<br>/// similar to<br>paired-Ig-like<br>receptor A11 ///<br>similar to paired-<br>Ig-like receptor<br>A11 /// similar to<br>paired-Ig-like<br>receptor B ///<br>similar to killer<br>activatory r |
| 1397657<br>_at | ---                                 | ---           | chr1:676643<br>44-<br>67664648<br>(+) // 18.41 //<br>q12                                                            |  | -<br>0.5<br>4 | 0.038 | ---                                                                                                                                                                                                                              |
| 1372306<br>_at | Ethe1                               | Rn.146<br>91  | chr1:798756<br>62-<br>79890680<br>(+) // 100.0 //<br>q21                                                            |  | 0.5<br>5      | 0.047 | ethylmalonic<br>encephalopathy<br>1                                                                                                                                                                                              |
| 1380557<br>_at | Bckdha                              | Rn.491<br>45  | chr1:808657<br>13-<br>80866687 (-)<br>// 66.13 //<br>q21                                                            |  | -<br>0.6<br>5 | 0.014 | branched chain<br>ketoacid<br>dehydrogenase<br>E1, alpha<br>polypeptide                                                                                                                                                          |
| 1390847<br>_at | Tmem86a                             | Rn.230<br>56  | chr1:976044<br>76-<br>97607566<br>(+) // 99.79 //<br>q22                                                            |  | -<br>0.5<br>4 | 0.040 | transmembrane<br>protein 86A                                                                                                                                                                                                     |
| 1377410<br>_at | E2f8                                | Rn.152<br>87  | chr1:986403<br>80-<br>98640837 (-)<br>// 80.57 //<br>q22                                                            |  | 0.6<br>4      | 0.016 | E2F<br>transcription<br>factor 8                                                                                                                                                                                                 |
| 1370239<br>_at | Hba-a2 ///<br>LOC3605<br>04         | Rn.107<br>334 | chr10:15584<br>358-<br>15585213 (-)<br>// 91.28 //<br>q12 ///<br>chr10:15554<br>907-<br>15571771 (-)<br>// 91.45 // |  | 0.8<br>9      | 0.009 | hemoglobin<br>alpha, adult<br>chain 2 ///<br>hemoglobin<br>alpha 2 chain                                                                                                                                                         |

|                  |                             |               |                                                                                                                            |               |       |                                                                          |  |
|------------------|-----------------------------|---------------|----------------------------------------------------------------------------------------------------------------------------|---------------|-------|--------------------------------------------------------------------------|--|
|                  |                             |               | q12                                                                                                                        |               |       |                                                                          |  |
| 1370240<br>_x_at | Hba-a2 ///<br>LOC3605<br>04 | Rn.107<br>334 | chr10:15584<br>358-<br>15585213 (-)<br>// 91.28 //<br>q12 ///<br>chr10:15554<br>907-<br>15571771 (-)<br>// 91.45 //<br>q12 | 0.8<br>4      | 0.010 | hemoglobin<br>alpha, adult<br>chain 2 ///<br>hemoglobin<br>alpha 2 chain |  |
| 1385190<br>_at   | ---                         | Rn.663<br>94  | chr10:18453<br>301-<br>18453731 (-)<br>// 99.77 //<br>q12                                                                  | 0.7<br>9      | 0.009 | ---                                                                      |  |
| 1387600<br>_at   | Gabrp                       | Rn.214<br>01  | chr10:18454<br>554-<br>18474566 (-)<br>// 87.86 //<br>q12                                                                  | 0.8<br>5      | 0.005 | gamma-<br>aminobutyric<br>acid (GABA-A)<br>receptor, pi                  |  |
| 1370461<br>_at   | Hmmr                        | Rn.923<br>04  | chr10:25732<br>539-<br>25762825 (-)<br>// 85.03 //<br>q12                                                                  | 0.6<br>9      | 0.013 | hyaluronan<br>mediated<br>motility receptor<br>(RHAMM)                   |  |
| 1391516<br>_at   | LOC3031<br>40               | ---           | chr10:39408<br>312-<br>39408866 (-)<br>// 85.23 //<br>q22                                                                  | -<br>0.5<br>1 | 0.043 | up-regulator of<br>carnitine<br>transporter,<br>OCTN2                    |  |
| 1368260<br>_at   | Aurkb                       | Rn.108<br>65  | chr10:55798<br>709-<br>55804363<br>(+) // 73.53 //<br>q24                                                                  | 0.5<br>8      | 0.035 | aurora kinase B                                                          |  |
| 1370864<br>_at   | Col1a1                      | Rn.295<br>3   | chr10:83622<br>548-<br>83639368<br>(+) // 98.17 //<br>q31                                                                  | 0.7<br>3      | 0.013 | collagen, type I,<br>alpha 1                                             |  |
| 1388116<br>_at   | Col1a1                      | Rn.295<br>3   | chr10:83622<br>548-<br>83639368<br>(+) // 98.17 //<br>q31                                                                  | 0.8<br>4      | 0.009 | collagen, type I,<br>alpha 1                                             |  |

|                  |         |               |                                                             |  |               |       |                                                                        |
|------------------|---------|---------------|-------------------------------------------------------------|--|---------------|-------|------------------------------------------------------------------------|
| 1372186<br>_a_at | Top2a   | Rn.909<br>96  | chr10:87770<br>881-<br>87771650 (-)<br>// 100.0 //<br>q31   |  | 0.6<br>9      | 0.009 | topoisomerase<br>(DNA) II alpha                                        |
| 1372153<br>_at   | Krt15   | Rn.153<br>568 | chr10:89071<br>914-<br>89073533 (-)<br>// 98.02 //<br>q32.1 |  | 0.7<br>1      | 0.018 | keratin 15                                                             |
| 1381233<br>_at   | ---     | Rn.217<br>08  | chr10:97297<br>929-<br>97298374 (-)<br>// 100.0 //<br>q32.1 |  | -<br>0.8<br>2 | 0.004 | ---                                                                    |
| 1368223<br>_at   | Adamts1 | Rn.789<br>7   | chr11:25433<br>792-<br>25443150 (-)<br>// 95.74 //<br>q11   |  | 0.8<br>8      | 0.005 | ADAM<br>metallopeptidas<br>e with<br>thrombospondin<br>type 1 motif, 1 |
| 1374251<br>_at   | ---     | Rn.146<br>492 | chr11:35596<br>790-<br>35597418<br>(+) // 99.68 //<br>q11   |  | -<br>0.6<br>4 | 0.020 | ---                                                                    |
| 1373628<br>_at   | ---     | Rn.102<br>6   | chr11:43736<br>425-<br>43737048<br>(+) // 89.21 //<br>q12   |  | 0.6<br>0      | 0.034 | ---                                                                    |
| 1370161<br>_at   | Ccdc80  | Rn.219<br>3   | chr11:57223<br>053-<br>57257257 (-)<br>// 95.08 //<br>q21   |  | 0.6<br>1      | 0.039 | coiled-coil<br>domain<br>containing 80                                 |
| 1398514<br>_at   | Hgd     | Rn.246<br>31  | chr11:64876<br>270-<br>64876614 (-)<br>// 94.77 //<br>q21   |  | -<br>0.5<br>9 | 0.049 | homogentisate<br>1, 2-<br>dioxygenase                                  |
| 1370926<br>_at   | Muc4    | Rn.249<br>30  | chr11:69830<br>275-<br>69858170 (-)<br>// 94.62 //<br>q22   |  | 0.6<br>3      | 0.018 | mucin 4, cell<br>surface<br>associated                                 |
| 1397326          | ---     | Rn.208        | chr11:84680                                                 |  | -             | 0.038 | ---                                                                    |



|            |            |           |                                               |                 |       |       |                                              |
|------------|------------|-----------|-----------------------------------------------|-----------------|-------|-------|----------------------------------------------|
| _at        |            | 647       | 821-84681238 (+) // 54.34 // q23              |                 | 0.54  |       |                                              |
| 1397370_at | ---        | Rn.204907 | chr12:19724858-19725627 (-) // 40.08 // q12   |                 | -0.57 | 0.020 | ---                                          |
| 1368188_at | Hpd        | Rn.3664   | chr12:34548319-34558384 (+) // 89.65 // q16   |                 | -0.62 | 0.016 | 4-hydroxyphenylpyruvate dioxygenase          |
| 1369491_at | Dao        | Rn.81058  | chr12:43627592-43648332 (-) // 98.06 // q16   |                 | -0.90 | 0.004 | D-amino-acid oxidase                         |
| 1382493_at | Cenpf      | Rn.41236  | chr13:105920538-105920931 (-) // 95.62 // q27 |                 | 0.61  | 0.020 | ---                                          |
| 1397730_at | RGD1307235 | Rn.38292  | chr13:11849937-11863618 (+) // 100.0 // p13   |                 | -0.53 | 0.049 | similar to RIKEN cDNA 2310035C23             |
| 1367728_at | Tsn        | Rn.156195 | chr13:30917405-30928093 (-) // 96.66 // q11   |                 | 0.72  | 0.008 | translin                                     |
| 1388219_at | Htr5b      | Rn.202942 | chr13:33545127-33558050 (-) // 88.44 // q11   | congenic Line 5 | 0.63  | 0.013 | 5-hydroxytryptamine (serotonin) receptor 5B  |
| 1395886_at | Actr3      | Rn.103326 | chr13:37881320-37904643 (-) // 99.79 // q11   | congenic Line 5 | 0.69  | 0.013 | ARP3 actin-related protein 3 homolog (yeast) |
| 1383111_at | ---        | Rn.220664 | chr13:40545750-                               | congenic        | -0.6  | 0.020 | ---                                          |

|                  |         |               |                                                           |                           |               |       |                                           |
|------------------|---------|---------------|-----------------------------------------------------------|---------------------------|---------------|-------|-------------------------------------------|
|                  |         |               | 40546434 (-)<br>// 81.78 //<br>q12                        | Line<br>5                 | 2             |       |                                           |
| 1373661<br>_a_at | Cxcr4   | Rn.444<br>31  | chr13:41308<br>284-<br>41308707 (-)<br>// 94.09 //<br>q12 | cong<br>enic<br>Line<br>5 | 0.5<br>8      | 0.035 | chemokine (C-<br>X-C motif)<br>receptor 4 |
| 1389244<br>_x_at | Cxcr4   | Rn.444<br>31  | chr13:41308<br>284-<br>41308707 (-)<br>// 94.09 //<br>q12 | cong<br>enic<br>Line<br>5 | 0.5<br>7      | 0.035 | chemokine (C-<br>X-C motif)<br>receptor 4 |
| 1370097<br>_a_at | Cxcr4   | Rn.444<br>31  | chr13:41308<br>548-<br>41312156 (-)<br>// 95.81 //<br>q12 | cong<br>enic<br>Line<br>5 | 0.6<br>8      | 0.012 | chemokine (C-<br>X-C motif)<br>receptor 4 |
| 1389113<br>_at   | Slc45a3 | Rn.923<br>9   | chr13:44860<br>762-<br>44861168<br>(+) // 95.08 //<br>q13 | cong<br>enic<br>Line<br>5 | -<br>0.9<br>0 | 0.001 | solute carrier<br>family 45,<br>member 3  |
| 1391613<br>_at   | Elk4    | Rn.204<br>345 | chr13:44911<br>374-<br>44911848<br>(+) // 52.34 //<br>q13 | cong<br>enic<br>Line<br>5 | -<br>0.6<br>0 | 0.021 | ELK4, member<br>of ETS<br>oncogene family |
| 1382230<br>_at   | Klhdc8a | Rn.443<br>39  | chr13:45194<br>599-<br>45195439<br>(+) // 97.11 //<br>q13 | cong<br>enic<br>Line<br>5 | -<br>0.5<br>5 | 0.031 | kelch domain<br>containing 8A             |
| 1397746<br>_at   | ---     | Rn.212<br>168 | chr13:45195<br>611-<br>45195996<br>(+) // 72.51 //<br>q13 | cong<br>enic<br>Line<br>5 | -<br>0.6<br>9 | 0.004 | ---                                       |
| 1391601<br>_at   | Lrrn2   | Rn.118<br>47  | chr13:45837<br>783-<br>45838309<br>(+) // 100.0 //<br>q13 | cong<br>enic<br>Line<br>9 | -<br>0.5<br>2 | 0.047 | leucine rich<br>repeat neuronal<br>2      |
| 1390271<br>_at   | Plekha6 | Rn.214<br>22  | chr13:46210<br>058-<br>46210710                           | cong<br>enic<br>Line      | -<br>2.0<br>6 | 0.000 | pleckstrin<br>homology<br>domain          |

|            |         |           |                                             |                  |       |       |                                                                                           |
|------------|---------|-----------|---------------------------------------------|------------------|-------|-------|-------------------------------------------------------------------------------------------|
|            |         |           | (+) // 96.41 // q13                         | 9                |       |       | containing, family A member 6                                                             |
| 1398516_at | Golt1a  | Rn.13207  | chr13:46224432-46237119 (+) // 100.0 // q13 | congenic Line 9  | 1.16  | 0.000 | golgi transport 1 homolog A (S. cerevisiae)                                               |
| 1378008_at | ---     | Rn.204209 | chr13:47449221-47449993 (+) // 86.62 // q13 | congenic Line 9  | -0.57 | 0.022 | ---                                                                                       |
| 1374123_at | ---     | Rn.25048  | chr13:47945366-47946010 (-) // 100.0 // q13 | congenic Line 9  | 0.94  | 0.001 | ---                                                                                       |
| 1389619_at | ---     | Rn.161322 | chr13:48378300-48378952 (-) // 81.9 // q13  | congenic Line 9  | -0.81 | 0.001 | ---                                                                                       |
| 1379346_at | Cdc73   | Rn.162332 | chr13:57441291-57442992 (-) // 98.15 // q21 |                  | -1.10 | 0.000 | cell division cycle 73, Paf1/RNA polymerase II complex component, homolog (S. cerevisiae) |
| 1398540_at | Rgs1    | Rn.14787  | chr13:58121195-58121856 (-) // 99.1 // q21  |                  | 0.57  | 0.013 | regulator of G-protein signaling 1                                                        |
| 1387566_at | Pla2g4a | Rn.10162  | chr13:64135723-64280803 (-) // 97.69 // q21 |                  | -0.60 | 0.016 | phospholipase A2, group IVA (cytosolic, calcium-dependent)                                |
| 1387454_at | Fam129a | Rn.211984 | chr13:66467072-66620158 (+) // 98.56 // q21 | congenic Line 26 | 0.93  | 0.001 | family with sequence similarity 129, member A                                             |
| 1379889_at | Lamc2   | Rn.9278   | chr13:68155279-                             | congenic         | 1.27  | 0.000 | laminin, gamma 2                                                                          |

|                |                  |               |                                                           |                            |               |       |                                                  |
|----------------|------------------|---------------|-----------------------------------------------------------|----------------------------|---------------|-------|--------------------------------------------------|
|                |                  |               | 68159154 (-)<br>// 97.59 //<br>q21                        | Line<br>26                 |               |       |                                                  |
| 1396877<br>_at | ---              | Rn.204<br>402 | chr13:68362<br>089-<br>68362554 (-)<br>// 50.31 //<br>q21 | cong<br>enic<br>Line<br>26 | 1.8<br>4      | 0.000 | ---                                              |
| 1374174<br>_at | ---              | Rn.114<br>503 | chr13:70171<br>114-<br>70171528<br>(+) // 58.62 //<br>q21 | cong<br>enic<br>Line<br>26 | -<br>0.5<br>3 | 0.036 | ---                                              |
| 1389775<br>_at | ---              | ---           | chr13:70179<br>712-<br>70180139 (-)<br>// 95.29 //<br>q21 | cong<br>enic<br>Line<br>26 | 0.7<br>5      | 0.008 | ---                                              |
| 1388963<br>_at | Astn1            | Rn.281<br>32  | chr13:73966<br>983-<br>73967532<br>(+) // 100.0 //<br>q22 | cong<br>enic<br>Line<br>26 | -<br>0.7<br>2 | 0.004 | astrotactin 1                                    |
| 1377675<br>_at | LOC1003<br>02372 | ---           | chr13:75494<br>982-<br>75495823<br>(+) // 82.16 //<br>q22 | cong<br>enic<br>Line<br>26 | -<br>0.7<br>2 | 0.004 | hypothetical<br>protein<br>LOC100302372          |
| 1398475<br>_at | Dars2            | Rn.137<br>838 | chr13:76602<br>121-<br>76602835 (-)<br>// 53.78 //<br>q22 | cong<br>enic<br>Line<br>26 | -<br>0.7<br>1 | 0.004 | aspartyl-tRNA<br>synthetase 2<br>(mitochondrial) |
| 1395471<br>_at | ---              | Rn.341<br>02  | chr13:76743<br>684-<br>76744061<br>(+) // 95.69 //<br>q22 | cong<br>enic<br>Line<br>26 | 0.6<br>4      | 0.012 | ---                                              |
| 1394574<br>_at | ---              | Rn.210<br>473 | chr13:76829<br>595-<br>76829997 (-)<br>// 94.58 //<br>q22 | cong<br>enic<br>Line<br>26 | -<br>1.0<br>9 | 0.000 | ---                                              |
| 1382031<br>_at | ---              | Rn.256<br>4   | chr13:78543<br>793-<br>78544624 (-)                       | cong<br>enic<br>Line       | -<br>0.8<br>4 | 0.003 | ---                                              |

|                |         |               |                                                           |    |               |       |                                                              |
|----------------|---------|---------------|-----------------------------------------------------------|----|---------------|-------|--------------------------------------------------------------|
|                |         |               | // 42.16 //<br>q22                                        | 26 |               |       |                                                              |
| 1392278<br>_at | ---     | Rn.211<br>531 | chr13:79665<br>934-<br>79666319<br>(+) // 68.58 //<br>q22 |    | 0.9<br>0      | 0.001 | ---                                                          |
| 1374320<br>_at | F5      | Rn.829<br>10  | chr13:79992<br>843-<br>79997293<br>(+) // 97.52 //<br>q22 |    | -<br>1.5<br>3 | 0.000 | coagulation<br>factor V<br>(proaccelerin,<br>labile factor)  |
| 1373947<br>_at | Dpt     | Rn.839<br>6   | chr13:80574<br>810-<br>80590528<br>(+) // 99.6 //<br>q23  |    | -<br>1.4<br>6 | 0.000 | dermatopontin                                                |
| 1381588<br>_at | Sft2d2  | Rn.842<br>4   | chr13:80926<br>906-<br>80927283 (-)<br>// 99.47 //<br>q23 |    | 0.5<br>7      | 0.044 | SFT2 domain<br>containing 2                                  |
| 1392947<br>_at | ---     | Rn.637<br>4   | chr13:83835<br>340-<br>83836041 (-)<br>// 96.82 //<br>q24 |    | 0.6<br>8      | 0.011 | ---                                                          |
| 1386911<br>_at | Atp1a2  | Rn.104<br>2   | chr13:88258<br>984-<br>88283918 (-)<br>// 97.5 // q24     |    | 0.6<br>9      | 0.012 | ATPase,<br>Na+/K+<br>transporting,<br>alpha 2<br>polypeptide |
| 1398390<br>_at | Cxcl13  | Rn.691<br>7   | chr14:15126<br>331-<br>15126759 (-)<br>// 95.32 //<br>p22 |    | 0.8<br>1      | 0.009 | chemokine (C-<br>X-C motif)<br>ligand 13                     |
| 1368760<br>_at | Cxcl2   | Rn.102<br>30  | chr14:18677<br>128-<br>18679175 (-)<br>// 93.82 //<br>p22 |    | 0.7<br>0      | 0.009 | chemokine (C-<br>X-C motif)<br>ligand 2                      |
| 1387314<br>_at | Sult1b1 | Rn.118<br>3   | chr14:22019<br>200-<br>22031908<br>(+) // 95.26 //        |    | -<br>0.7<br>0 | 0.012 | sulfotransferase<br>family, cytosolic,<br>1B, member 1       |

|                |         |               |                                                            |  |               |       |                                                                   |
|----------------|---------|---------------|------------------------------------------------------------|--|---------------|-------|-------------------------------------------------------------------|
|                |         |               | p21                                                        |  |               |       |                                                                   |
| 1382954<br>_at | ---     | Rn.131<br>875 | chr14:38340<br>370-<br>38340833<br>(+) // 94.4 //<br>p11   |  | -<br>1.3<br>6 | 0.000 | ---                                                               |
| 1368168<br>_at | Slc34a2 | Rn.169<br>33  | chr14:62659<br>554-<br>62671676 (-)<br>// 95.65 //<br>q11  |  | 0.7<br>9      | 0.009 | solute carrier<br>family 34<br>(sodium<br>phosphate),<br>member 2 |
| 1379903<br>_at | ---     | Rn.988<br>31  | chr14:79415<br>489-<br>79416111 (-)<br>// 99.68 //<br>q21  |  | 0.7<br>1      | 0.012 | ---                                                               |
| 1384043<br>_at | ---     | Rn.173<br>529 | chr14:79416<br>114-<br>79416960 (-)<br>// 91.81 //<br>q21  |  | 0.5<br>8      | 0.040 | ---                                                               |
| 1396742<br>_at | lpo5    | Rn.798<br>93  | chr15:10600<br>1263-<br>106003232<br>(+) // 94.3 //<br>q24 |  | 0.5<br>9      | 0.046 | importin 5                                                        |
| 1379739<br>_at | ---     | Rn.253<br>45  | chr15:12068<br>174-<br>12068719 (-)<br>// 95.78 //<br>p16  |  | -<br>0.5<br>7 | 0.022 | ---                                                               |
| 1372685<br>_at | Cdkn3   | Rn.107<br>220 | chr15:22624<br>369-<br>22628748<br>(+) // 100.0 //<br>p14  |  | 0.6<br>4      | 0.019 | cyclin-<br>dependent<br>kinase inhibitor<br>3                     |
| 1380883<br>_at | ---     | Rn.145<br>88  | chr15:36851<br>030-<br>36851547<br>(+) // 98.84 //<br>p12  |  | -<br>0.5<br>7 | 0.021 | ---                                                               |
| 1372979<br>_at | ---     | Rn.933<br>4   | chr15:38662<br>83-3866864<br>(+) // 96.83 //<br>p16        |  | -<br>0.5<br>7 | 0.028 | ---                                                               |
| 1397341        | Pbk     | Rn.137        | chr15:45237                                                |  | 0.5           | 0.034 | PDZ binding                                                       |

|              |           |           |                                               |  |       |       |                                                                            |
|--------------|-----------|-----------|-----------------------------------------------|--|-------|-------|----------------------------------------------------------------------------|
| _at          |           | 333       | 699-45238098 (+) // 100.0 // p12              |  | 6     |       | kinase                                                                     |
| 1372809_at   | LOC290595 | Rn.103148 | chr16:13308803-13316409 (-) // 95.97 // p14   |  | 0.80  | 0.008 | hypothetical gene supported by AF152002                                    |
| 1376829_at   | ---       | Rn.39005  | chr16:67694032-67694522 (+) // 92.45 // q12.3 |  | -0.75 | 0.004 | ---                                                                        |
| 1397547_at   | lkbb      | Rn.19222  | chr16:73861758-73862249 (+) // 8.63 // q12.5  |  | -0.59 | 0.016 | Inhibitor of kappa light polypeptide gene enhancer in B-cells, kinase beta |
| 1371913_at   | Tgfbi     | Rn.1046   | chr17:13904881-13905464 (-) // 99.66 // p14   |  | 0.73  | 0.015 | transforming growth factor, beta induced                                   |
| 1389678_at   | ---       | Rn.38259  | chr17:14076943-14077620 (-) // 97.49 // p14   |  | -0.79 | 0.003 | ---                                                                        |
| 1368680_a_at | Slc34a1   | Rn.92022  | chr17:15262928-15268863 (-) // 89.81 // p14   |  | -0.77 | 0.006 | solute carrier family 34 (sodium phosphate), member 1                      |
| 1385856_at   | Riok1     | Rn.132553 | chr17:32994646-32995672 (-) // 91.93 // p12   |  | 0.82  | 0.007 | RIO kinase 1 (yeast)                                                       |
| 1380346_at   | Serpib1a  | Rn.103402 | chr17:37951976-37954921 (+) // 100.0 // p12   |  | 0.88  | 0.004 | serine (or cysteine) proteinase inhibitor, clade B, member 1a              |
| 1377034      | Serpib1a  | Rn.103    | chr17:37958                                   |  | 0.7   | 0.009 | serine (or                                                                 |

|              |         |           |                                               |  |       |       |                                                    |
|--------------|---------|-----------|-----------------------------------------------|--|-------|-------|----------------------------------------------------|
| _at          |         | 402       | 777-37959288 (+) // 100.0 // p12              |  | 8     |       | cysteine) proteinase inhibitor, clade B, member 1a |
| 1378236_at   | Lrrc16a | Rn.40387  | chr17:48180102-48188855 (+) // 99.6 // p11    |  | 0.60  | 0.034 | leucine rich repeat containing 16A                 |
| 1383486_at   | ---     | Rn.35842  | chr17:57240189-57240871 (-) // 97.14 // q12.1 |  | 0.70  | 0.013 | ---                                                |
| 1385025_a_at | Gpr137b | Rn.60453  | chr17:67000798-67004339 (+) // 99.81 // q12.1 |  | 0.77  | 0.009 | G protein-coupled receptor 137B                    |
| 1393148_at   | Gpr137b | Rn.60453  | chr17:67000855-67006473 (+) // 99.84 // q12.1 |  | 0.65  | 0.015 | G protein-coupled receptor 137B                    |
| 1378097_at   | ---     | Rn.21452  | chr17:67016111-67016772 (+) // 91.72 // q12.1 |  | -0.66 | 0.009 | ---                                                |
| 1368077_at   | Fbp1    | Rn.33703  | chr17:7795814-7818041 (+) // 86.78 // p14     |  | -0.81 | 0.004 | fructose-1,6-biphosphatase 1                       |
| 1380670_at   | ---     | Rn.207220 | chr17:82995739-82996341 (+) // 97.73 // q12.3 |  | -0.55 | 0.035 | ---                                                |
| 1383380_at   | Rpp38   | Rn.2690   | chr17:86036507-86036982 (+) // 95.19 // q12.3 |  | 0.58  | 0.047 | ribonuclease P/MRP 38 subunit (human)              |
| 1391256_at   | ---     | Rn.91712  | chr17:86038215-86038649                       |  | 0.88  | 0.004 | ---                                                |



|                  |                |               |                                                             |  |               |       |                                                                                                        |
|------------------|----------------|---------------|-------------------------------------------------------------|--|---------------|-------|--------------------------------------------------------------------------------------------------------|
|                  |                |               | (+) // 52.43 //<br>q12.3                                    |  |               |       |                                                                                                        |
| 1380418<br>_at   | ---            | Rn.209<br>714 | chr17:86152<br>733-<br>86152909 (-)<br>// 41.87 //<br>q12.3 |  | 1.2<br>9      | 0.000 | ---                                                                                                    |
| 1379423<br>_at   | Rsu1           | Rn.114<br>53  | chr17:87345<br>488-<br>87345935<br>(+) // 96.1 //<br>q12.3  |  | -<br>1.8<br>9 | 0.000 | Ras suppressor<br>protein 1                                                                            |
| 1392953<br>_at   | Ptpla          | Rn.383<br>34  | chr17:88239<br>566-<br>88243637 (-)<br>// 92.97 //<br>q12.3 |  | 0.5<br>9      | 0.025 | protein tyrosine<br>phosphatase-<br>like (proline<br>instead of<br>catalytic<br>arginine),<br>member a |
| 1383696<br>_at   | Ptpla          | Rn.383<br>34  | chr17:88253<br>097-<br>88253571 (-)<br>// 100.0 //<br>q12.3 |  | 0.5<br>7      | 0.034 | protein tyrosine<br>phosphatase-<br>like (proline<br>instead of<br>catalytic<br>arginine),<br>member a |
| 1368172<br>_a_at | Lox            | Rn.113<br>72  | chr18:47893<br>877-<br>47906673 (-)<br>// 99.45 //<br>q11   |  | 0.6<br>3      | 0.015 | lysyl oxidase                                                                                          |
| 1391693<br>_at   | Atp8b1         | Rn.695<br>7   | chr18:60749<br>041-<br>60756769 (-)<br>// 97.39 //<br>q12.1 |  | 0.6<br>5      | 0.020 | ATPase, Class<br>I, type 8B,<br>member 1                                                               |
| 1391317<br>_at   | RGD1310<br>784 | Rn.106<br>906 | chr18:70988<br>483-<br>70989335 (-)<br>// 93.9 //<br>q12.2  |  | 0.6<br>7      | 0.012 | similar to RIKEN<br>cDNA<br>2810433K01                                                                 |
| 1369254<br>_a_at | Ptger1         | Rn.114<br>23  | chr19:26160<br>457-<br>26163156 (-)<br>// 88.13 //<br>q11   |  | -<br>0.5<br>3 | 0.037 | prostaglandin E<br>receptor 1<br>(subtype EP1)                                                         |

|                  |               |               |                                                            |               |       |                                                           |
|------------------|---------------|---------------|------------------------------------------------------------|---------------|-------|-----------------------------------------------------------|
| 1374167<br>_at   | rCG_5140<br>6 | Rn.220<br>423 | chr19:35732<br>521-<br>35733120<br>(+) // 100.0 //<br>q12  | -<br>0.5<br>7 | 0.025 | neuritin 1-like                                           |
| 1387157<br>_at   | Pmfbp1        | Rn.515<br>02  | chr19:39362<br>519-<br>39411269<br>(+) // 96.77 //<br>q12  | 0.6<br>8      | 0.019 | polyamine<br>modulated<br>factor 1 binding<br>protein 1   |
| 1378898<br>_at   | ---           | Rn.208<br>048 | chr19:40900<br>622-<br>40901049<br>(+) // 46.85 //<br>q12  | -<br>0.7<br>1 | 0.004 | ---                                                       |
| 1394079<br>_at   | Tbl1xr1       | Rn.140<br>831 | chr2:107683<br>655-<br>107684388<br>(+) // 89.51 //<br>q24 | 0.6<br>1      | 0.043 | transducin<br>(beta)-like 1 X-<br>linked receptor 1       |
| 1383747<br>_at   | Ect2          | Rn.168<br>292 | chr2:112969<br>263-<br>112969828<br>(-) // 96.23 //<br>q24 | 0.5<br>8      | 0.030 | epithelial cell<br>transforming<br>sequence 2<br>oncogene |
| 1379582<br>_a_at | Ccna2         | Rn.130<br>94  | chr2:123062<br>863-<br>123063335<br>(-) // 99.79 //<br>q25 | 0.7<br>9      | 0.005 | cyclin A2                                                 |
| 1373911<br>_at   | Postn         | Rn.305<br>16  | chr2:143567<br>577-<br>143568339<br>(+) // 100.0 //<br>q26 | 0.8<br>4      | 0.009 | periostin,<br>osteoblast<br>specific factor               |
| 1371173<br>_a_at | Cast          | Rn.174<br>81  | chr2:149732<br>5-1558604 (-<br>) // 99.5 //<br>q11         | 0.6<br>2      | 0.038 | calpastatin                                               |
| 1383008<br>_at   | Smc4          | Rn.163<br>695 | chr2:158998<br>991-<br>159001274<br>(+) // 100.0 //<br>q31 | 0.6<br>9      | 0.012 | structural<br>maintenance of<br>chromosomes 4             |
| 1375335<br>_at   | Hsp90ab1      | Rn.986<br>67  | chr2:170299<br>391-                                        | 0.6<br>0      | 0.046 | heat shock<br>protein 90kDa                               |

|                  |                   |               |                                                                                                                                                                                                                                                                                                                                   |               |       |                                                                 |                                           |
|------------------|-------------------|---------------|-----------------------------------------------------------------------------------------------------------------------------------------------------------------------------------------------------------------------------------------------------------------------------------------------------------------------------------|---------------|-------|-----------------------------------------------------------------|-------------------------------------------|
|                  |                   |               | 170308287<br>(+) // 85.61 //<br>q32 ///<br>chr2:174024<br>305-<br>174026774<br>(+) // 84.27 //<br>q33 ///<br>chr3:366338<br>62-<br>36636364<br>(+) // 92.61 //<br>q12 ///<br>chr9:110334<br>54-<br>11039001<br>(+) // 95.65 //<br>q12 ///<br>chr19:34281<br>728-<br>34284213<br>(+) // 84.23 //<br>q11 ///<br>chr1:106346<br>670- |               |       |                                                                 | alpha<br>(cytosolic), class<br>B member 1 |
| 1395126<br>_at   | Fcrls             | Rn.768<br>19  | chr2:179283<br>588-<br>179284079<br>(-) // 97.97 //<br>q34                                                                                                                                                                                                                                                                        | 0.7<br>6      | 0.011 | Fc receptor-like<br>S, scavenger<br>receptor                    |                                           |
| 1390878<br>_at   | LOC6813<br>09     | Rn.198<br>600 | chr2:181393<br>216-<br>181395130<br>(+) // 100.0 //<br>q34                                                                                                                                                                                                                                                                        | 0.6<br>1      | 0.045 | similar to<br>Thrombospondi<br>n-3 precursor                    |                                           |
| 1369502<br>_a_at | Amy1a ///<br>Amy2 | Rn.670<br>70  | chr2:209469<br>273-<br>209518455<br>(-) // 99.81 //<br>q41 ///<br>chr2:209325<br>427-<br>209447436<br>(-) // 96.76 //<br>q41 ///<br>chr2:209291                                                                                                                                                                                   | -<br>0.5<br>5 | 0.034 | amylase, alpha<br>1A (salivary) ///<br>amylase 2,<br>pancreatic |                                           |

|                |        |               |                                                            |  |               |       |                                                 |
|----------------|--------|---------------|------------------------------------------------------------|--|---------------|-------|-------------------------------------------------|
|                |        |               | 708-<br>209482095<br>(-) // 75.98 //<br>q41 ///            |  |               |       |                                                 |
| 1373351<br>_at | Ank2   | Rn.133<br>131 | chr2:224180<br>616-<br>224181006<br>(-) // 88.56 //<br>q42 |  | -<br>0.5<br>3 | 0.049 | ankyrin 2,<br>neuronal                          |
| 1368205<br>_at | Cfi    | Rn.742<br>4   | chr2:227281<br>540-<br>227325106<br>(+) // 76.28 //<br>q43 |  | 0.7<br>4      | 0.015 | complement<br>factor I                          |
| 1391417<br>_at | Bhmt2  | Rn.849<br>4   | chr2:239580<br>44-<br>23976415 (-)<br>// 96.24 //<br>q12   |  | -<br>0.9<br>9 | 0.002 | betaine-<br>homocysteine<br>methyltransferase 2 |
| 1370936<br>_at | Dmgdh  | Rn.364<br>6   | chr2:239765<br>94-<br>24052768<br>(+) // 99.29 //<br>q12   |  | -<br>0.7<br>0 | 0.008 | dimethylglycine<br>dehydrogenase                |
| 1376914<br>_at | Depdc1 | Rn.270<br>37  | chr2:257796<br>817-<br>257797372<br>(+) // 84.35 //<br>q45 |  | 0.5<br>5      | 0.049 | DEP domain<br>containing 1                      |
| 1370345<br>_at | Ccnb1  | Rn.923<br>2   | chr2:315735<br>78-<br>31581754 (-)<br>// 88.03 //<br>q12   |  | 0.6<br>7      | 0.021 | cyclin B1                                       |
| 1376944<br>_at | ---    | Rn.205<br>026 | chr2:596885<br>47-<br>59689210<br>(+) // 100.0 //<br>q16   |  | -<br>0.9<br>0 | 0.001 | ---                                             |
| 1368659<br>_at | Agxt2  | Rn.187<br>4   | chr2:597133<br>50-                                         |  | -<br>0.6      | 0.043 | alanine-<br>glyoxylate                          |

|                |                              |               |                                                                                                                          |  |               |       |                                                                                                                                                                                |
|----------------|------------------------------|---------------|--------------------------------------------------------------------------------------------------------------------------|--|---------------|-------|--------------------------------------------------------------------------------------------------------------------------------------------------------------------------------|
|                |                              |               | 59755149<br>(+) // 80.21 //<br>q16                                                                                       |  | 0             |       | aminotransferase 2                                                                                                                                                             |
| 1391587<br>_at | ---                          | Rn.168<br>09  | chr2:773923<br>35-<br>77392908<br>(+) // 52.53 //<br>q22                                                                 |  | -<br>0.6<br>2 | 0.012 | ---                                                                                                                                                                            |
| 1373990<br>_at | LOC3619<br>14 ///<br>Slc7a12 | Rn.343<br>57  | chr2:886201<br>86-<br>88620706 (-)<br>// 54.53 //<br>q23 ///<br>chr2:884292<br>42-<br>88429760 (-)<br>// 53.77 //<br>q23 |  | -<br>0.8<br>8 | 0.002 | similar to solute carrier family 7 (cationic amino acid transporter, y+ system), member 12 /// solute carrier family 7 (cationic amino acid transporter, y+ system), member 12 |
| 1380340<br>_at | ---                          | Rn.637<br>89  | chr2_random:3132330-<br>3132781 (-)<br>// 96.15 //                                                                       |  | -<br>0.8<br>2 | 0.003 | ---                                                                                                                                                                            |
| 1380972<br>_at | ---                          | ---           | chr2_random:3463968-<br>3464468 (+)<br>// 84.2 //                                                                        |  | -<br>0.5<br>5 | 0.030 | ---                                                                                                                                                                            |
| 1367776<br>_at | Cdc2                         | Rn.693<br>4   | chr20:20018<br>043-<br>20044033<br>(+) // 100.0 //<br>p11                                                                |  | 0.6<br>4      | 0.018 | cell division cycle 2, G1 to S and G2 to M                                                                                                                                     |
| 1387218<br>_at | Tff3                         | Rn.874<br>77  | chr20:94698<br>87-9474604<br>(-) // 99.54 //<br>p12                                                                      |  | -<br>0.7<br>9 | 0.006 | trefoil factor 3, intestinal                                                                                                                                                   |
| 1383578<br>_at | Rad51                        | Rn.204<br>74  | chr3:105649<br>900-<br>105650400<br>(+) // 90.52 //<br>q35                                                               |  | 0.6<br>6      | 0.021 | RAD51 homolog (RecA homolog, E. coli) (S. cerevisiae)                                                                                                                          |
| 1392732<br>_at | Nusap1                       | Rn.106<br>933 | chr3:106134<br>434-<br>106164609<br>(+) // 95.35 //                                                                      |  | 0.5<br>5      | 0.045 | nucleolar and spindle associated protein 1                                                                                                                                     |

|                |        |               |                                                            |               |       |                                                         |  |
|----------------|--------|---------------|------------------------------------------------------------|---------------|-------|---------------------------------------------------------|--|
|                |        |               | q35                                                        |               |       |                                                         |  |
| 1384280<br>_at | Nusap1 | Rn.106<br>933 | chr3:106164<br>591-<br>106164957<br>(+) // 94.82 //<br>q35 | 0.5<br>5      | 0.045 | nucleolar and<br>spindle<br>associated<br>protein 1     |  |
| 1398256<br>_at | Il1b   | Rn.986<br>9   | chr3:116964<br>426-<br>116970887<br>(-) // 96.03 //<br>q36 | 0.7<br>0      | 0.009 | interleukin 1<br>beta                                   |  |
| 1390743<br>_at | ---    | Rn.607<br>98  | chr3:148264<br>702-<br>148264983<br>(-) // 51.23 //<br>q42 | -<br>0.5<br>1 | 0.043 | ---                                                     |  |
| 1392969<br>_at | ---    | Rn.122<br>38  | chr3:154485<br>187-<br>154485651<br>(+) // 94.89 //<br>q42 | -<br>0.7<br>5 | 0.006 | ---                                                     |  |
| 1372264<br>_at | Pck1   | Rn.104<br>376 | chr3:164017<br>885-<br>164018347<br>(+) // 74.9 //<br>q42  | -<br>1.1<br>1 | 0.001 | phosphoenolpyr<br>uvate<br>carboxykinase 1<br>(soluble) |  |
| 1379058<br>_at | ---    | Rn.585<br>4   | chr3:171302<br>84-<br>17130625<br>(+) // 88.31 //<br>q11   | 0.5<br>3      | 0.026 | ---                                                     |  |
| 1387382<br>_at | Hnmt   | Rn.131<br>45  | chr3:205759<br>4-2090011 (-<br>) // 94.09 //<br>p13        | -<br>1.2<br>9 | 0.000 | histamine N-<br>methyltransferas<br>e                   |  |
| 1381575<br>_at | Neb    | Rn.134<br>031 | chr3:336344<br>32-<br>33634813 (-)<br>// 100.0 //<br>q12   | -<br>0.8<br>9 | 0.001 | nebulin                                                 |  |
| 1374630<br>_at | Clic3  | Rn.250<br>03  | chr3:362398<br>1-3725117<br>(+) // 96.43 //<br>p13         | -<br>0.5<br>8 | 0.044 | chloride<br>intracellular<br>channel 3                  |  |
| 1376945<br>_at | ---    | Rn.471<br>39  | chr3:479811<br>03-                                         | -<br>0.5      | 0.046 | ---                                                     |  |

|                  |               |               |                                                               |  |               |       |                                                    |
|------------------|---------------|---------------|---------------------------------------------------------------|--|---------------|-------|----------------------------------------------------|
|                  |               |               | 47981762<br>(+) // 93.81 //<br>q21                            |  | 1             |       |                                                    |
| 1367952<br>_at   | Lrp2          | Rn.264<br>30  | chr3:515637<br>60-<br>51724478 (-)<br>// 99.77 //<br>q21      |  | -<br>0.6<br>7 | 0.015 | low density<br>lipoprotein-<br>related protein 2   |
| 1387378<br>_at   | Fcnb          | Rn.482<br>81  | chr3:701093<br>4-7019366 (-)<br>// 99.58 //<br>p12            |  | 0.6<br>0      | 0.050 | ficolin B                                          |
| 1395173<br>_at   | Caprin1       | Rn.225<br>72  | chr3:890699<br>11-<br>89073766 (-)<br>// 98.0 // q32          |  | 0.8<br>7      | 0.003 | cell cycle<br>associated<br>protein 1              |
| 1394419<br>_at   | Arhgap11<br>a | Rn.516<br>73  | chr3:996769<br>55-<br>99677766 (-)<br>// 100.0 //<br>q34      |  | 0.6<br>1      | 0.022 | Rho GTPase<br>activating<br>protein 11A            |
| 1378365<br>_at   | ---           | Rn.154<br>314 | chr4:117516<br>422-<br>117516800<br>(+) // 100.0 //<br>q34    |  | -<br>0.9<br>6 | 0.001 | ---                                                |
| 1388176<br>_at   | Cml5          | Rn.205<br>673 | chr4:119981<br>268-<br>119981789<br>(-) // 97.74 //<br>q34    |  | -<br>0.5<br>6 | 0.029 | camello-like 5                                     |
| 1368249<br>_at   | Klf15         | Rn.225<br>56  | chr4:124714<br>394-<br>124726985<br>(+) // 98.95 //<br>q34    |  | -<br>0.9<br>1 | 0.001 | Kruppel-like<br>factor 15                          |
| 1381396<br>_s_at | Klf15         | Rn.225<br>56  | chr4:124719<br>208-<br>124726016<br>(+) // 51.46 //<br>q34    |  | -<br>0.6<br>6 | 0.009 | Kruppel-like<br>factor 15                          |
| 1373823<br>_at   | Cks2          | Rn.611<br>6   | chr4:146600<br>456-<br>146601035<br>(+) // 92.8 //<br>q41 /// |  | 0.6<br>2      | 0.035 | CDC28 protein<br>kinase<br>regulatory<br>subunit 2 |

|              |                  |           |                                                                                              |  |       |       |                                                                                 |
|--------------|------------------|-----------|----------------------------------------------------------------------------------------------|--|-------|-------|---------------------------------------------------------------------------------|
|              |                  |           | chr17:19423498-19429420 (-) // 98.49 // p14 /// chr3:104267742-104268325 (-) // 91.46 // q35 |  |       |       |                                                                                 |
| 1379135_at   | Ttll3            | Rn.198684 | chr4:149282067-149282413 (+) // 69.23 // q42                                                 |  | -0.59 | 0.020 | tubulin tyrosine ligase-like family, member 3                                   |
| 1387295_at   | Slc6a12          | Rn.11352  | chr4:157781177-157800190 (+) // 94.47 // q42                                                 |  | -0.68 | 0.011 | solute carrier family 6 (neurotransmitter transporter, betaine/GABA), member 12 |
| 1367794_at   | A2m              | Rn.109457 | chr4:158103688-158153693 (+) // 98.55 // q42                                                 |  | 1.36  | 0.000 | alpha-2-macroglobulin                                                           |
| 1374449_at   | Cdca3            | Rn.129078 | chr4:160955417-160956856 (+) // 94.21 // q42 /// chr9:43464499-43465083 (+) // 66.44 // q22  |  | 0.64  | 0.016 | cell division cycle associated 3                                                |
| 1368683_at   | Olr1             | Rn.87449  | chr4:166747226-166769340 (-) // 64.04 // q42                                                 |  | 0.60  | 0.035 | oxidized low density lipoprotein (lectin-like) receptor 1                       |
| 1388282_s_at | Klra5 /// Ly49s7 | Rn.37467  | chr4:168698329-168716439 (-) // 99.38 // q42 ///                                             |  | 0.91  | 0.004 | killer cell lectin-like receptor, subfamily A, member 5 /// Ly49 stimulatory    |



|                  |         |               |                                                            |  |               |       |                                                                         |
|------------------|---------|---------------|------------------------------------------------------------|--|---------------|-------|-------------------------------------------------------------------------|
|                  |         |               | chr4:168640<br>016-<br>168670204<br>(-) // 98.89 //<br>q42 |  |               |       | receptor 7                                                              |
| 1398253<br>_at   | Kap     | Rn.111<br>43  | chr4:170652<br>192-<br>170655239<br>(-) // 90.17 //<br>q43 |  | -<br>0.8<br>9 | 0.003 | kidney androgen<br>regulated<br>protein                                 |
| 1375704<br>_at   | Atf7ip  | Rn.984<br>69  | chr4:173566<br>919-<br>173570093<br>(+) // 100.0 //<br>q43 |  | 0.5<br>8      | 0.034 | activating<br>transcription<br>factor 7<br>interacting<br>protein       |
| 1395687<br>_at   | Atf7ip  | Rn.984<br>69  | chr4:173571<br>332-<br>173576643<br>(+) // 95.32 //<br>q43 |  | 0.6<br>4      | 0.018 | activating<br>transcription<br>factor 7<br>interacting<br>protein       |
| 1387567<br>_at   | Slco1a1 | ---           | chr4:179431<br>195-<br>179829799<br>(-) // 92.28 //<br>q44 |  | -<br>0.9<br>1 | 0.002 | solute carrier<br>organic anion<br>transporter<br>family, member<br>1a1 |
| 1368498<br>_a_at | Slc21a4 | Rn.202<br>967 | chr4:179552<br>663-<br>179592111<br>(-) // 95.75 //<br>q44 |  | -<br>0.8<br>1 | 0.004 | kidney specific<br>organic anion<br>transporter                         |
| 1369401<br>_at   | Slco1a6 | ---           | chr4:179688<br>188-<br>179723995<br>(-) // 100.0 //<br>q44 |  | -<br>0.9<br>6 | 0.002 | solute carrier<br>organic anion<br>transporter<br>family, member<br>1a6 |
| 1387287<br>_a_at | Abcc9   | Rn.105<br>28  | chr4:180168<br>420-<br>180582914<br>(-) // 66.98 //<br>q44 |  | 0.7<br>1      | 0.012 | ATP-binding<br>cassette, sub-<br>family C<br>(CFTR/MRP),<br>member 9    |
| 1370869<br>_at   | Bcat1   | Rn.827<br>3   | chr4:182641<br>519-<br>182725922<br>(-) // 85.23 //<br>q44 |  | 0.5<br>2      | 0.049 | branched chain<br>aminotransferase<br>1, cytosolic                      |
| 1387487          | Calcr   | Rn.100        | chr4:284862                                                |  | 0.7           | 0.009 | calcitonin                                                              |

|            |        |               |                                                      |  |               |       |                                                                         |
|------------|--------|---------------|------------------------------------------------------|--|---------------|-------|-------------------------------------------------------------------------|
| _a_at      |        | 62            | 13-28561065 (-)<br>// 98.23 //<br>q13                |  | 5             |       | receptor                                                                |
| 1370155_at | Col1a2 | Rn.107<br>239 | chr4:293936<br>44-29429088<br>(+) // 97.96 //<br>q13 |  | 0.5<br>9      | 0.034 | collagen, type I,<br>alpha 2                                            |
| 1387854_at | Col1a2 | Rn.107<br>239 | chr4:293936<br>44-29429088<br>(+) // 97.96 //<br>q13 |  | 0.6<br>1      | 0.034 | collagen, type I,<br>alpha 2                                            |
| 1369218_at | Met    | Rn.106<br>17  | chr4:431341<br>82-43211357<br>(+) // 99.9 //<br>q21  |  | 0.6<br>4      | 0.035 | met proto-<br>oncogene                                                  |
| 1384960_at | Cftr   | Rn.124<br>539 | chr4:440411<br>61-44041873<br>(+) // 97.05 //<br>q21 |  | -<br>0.6<br>7 | 0.010 | cystic fibrosis<br>transmembrane<br>conductance<br>regulator<br>homolog |
| 1369191_at | Il6    | Rn.987<br>3   | chr4:456798<br>-461376 (-) //<br>90.73 // q11        |  | 0.5<br>8      | 0.025 | interleukin 6                                                           |
| 1391625_at | Wasl   | ---           | chr4:510637<br>14-51067525 (-)<br>// 70.18 //<br>q22 |  | 0.5<br>9      | 0.035 | Wiskott-Aldrich<br>syndrome-like                                        |
| 1368187_at | Gpmb   | Rn.137<br>78  | chr4:771613<br>51-77182624<br>(+) // 96.6 //<br>q24  |  | 0.6<br>4      | 0.049 | glycoprotein<br>(transmembrane<br>) mb                                  |
| 1388778_at | ---    | Rn.176<br>29  | chr4:873924<br>55-87393064<br>(+) // 99.34 //<br>q24 |  | -<br>0.6<br>1 | 0.019 | ---                                                                     |
| 1376685_at | ---    | Rn.408<br>21  | chr5:101680<br>817-101681630<br>(-) // 84.0 //       |  | 0.8<br>3      | 0.005 | ---                                                                     |

|                  |                      |               |                                                            |  |               |       |                                                                                                                                      |
|------------------|----------------------|---------------|------------------------------------------------------------|--|---------------|-------|--------------------------------------------------------------------------------------------------------------------------------------|
|                  |                      |               | q31                                                        |  |               |       |                                                                                                                                      |
| 1373538<br>_at   | Usp1                 | Rn.155<br>728 | chr5:119368<br>425-<br>119371527<br>(+) // 97.99 //<br>q33 |  | 0.6<br>0      | 0.049 | ubiquitin specific<br>peptidase 1                                                                                                    |
| 1371824<br>_at   | Ak3l1                | Rn.108<br>6   | chr5:122122<br>204-<br>122122785<br>(+) // 100.0 //<br>q33 |  | -<br>0.6<br>6 | 0.023 | adenylate<br>kinase 3-like 1                                                                                                         |
| 1368607<br>_at   | Cyp4a8               | Rn.100<br>34  | chr5:135547<br>363-<br>135578186<br>(-) // 98.88 //<br>q36 |  | -<br>0.8<br>6 | 0.003 | cytochrome<br>P450, family 4,<br>subfamily a,<br>polypeptide 8                                                                       |
| 1394844<br>_s_at | Cyp4a2 ///<br>Cyp4a3 | Rn.334<br>92  | chr5:135876<br>135-<br>135876559<br>(-) // 94.81 //<br>q36 |  | -<br>1.1<br>4 | 0.000 | cytochrome<br>P450, family 4,<br>subfamily a,<br>polypeptide 2 ///<br>cytochrome<br>P450, family 4,<br>subfamily a,<br>polypeptide 3 |
| 1368006<br>_at   | Laptn5               | Rn.247<br>99  | chr5:149775<br>671-<br>149797167<br>(+) // 94.28 //<br>q36 |  | 0.8<br>0      | 0.009 | lysosomal<br>multispanning<br>membrane<br>protein 5                                                                                  |
| 1380579<br>_at   | Matn1                | Rn.151<br>59  | chr5:149812<br>569-<br>149815428<br>(+) // 95.39 //<br>q36 |  | -<br>3.5<br>8 | 0.000 | matrilin 1,<br>cartilage matrix<br>protein                                                                                           |
| 1392607<br>_at   | ---                  | Rn.227<br>47  | chr5:150809<br>645-<br>150810008<br>(-) // 91.18 //<br>q36 |  | -<br>0.5<br>8 | 0.024 | ---                                                                                                                                  |
| 1387804<br>_at   | Trim63               | Rn.406<br>36  | chr5:153059<br>572-<br>153073942<br>(+) // 88.38 //<br>q36 |  | -<br>0.6<br>1 | 0.029 | tripartite motif-<br>containing 63                                                                                                   |
| 1368121<br>_at   | Akr7a3               | Rn.604<br>3   | chr5:158139<br>987-                                        |  | -<br>0.7      | 0.004 | aldo-keto<br>reductase family                                                                                                        |

|                |               |               |                                                                                                                                                                                             |  |               |       |                                                                                                |
|----------------|---------------|---------------|---------------------------------------------------------------------------------------------------------------------------------------------------------------------------------------------|--|---------------|-------|------------------------------------------------------------------------------------------------|
|                |               |               | 158147516<br>(+) // 98.66 //<br>q36                                                                                                                                                         |  | 8             |       | 7, member A3<br>(aflatoxin<br>aldehyde<br>reductase)                                           |
| 1373282<br>_at | LOC6914<br>31 | Rn.876<br>3   | chr5:166836<br>558-<br>166838641<br>(-) // 97.58 //<br>q36                                                                                                                                  |  | -<br>0.5<br>8 | 0.020 | similar to<br>mitochondrial<br>carrier protein<br>MGC4399                                      |
| 1374259<br>_at | ---           | Rn.147<br>583 | chr5:172116<br>06-<br>17212202 (-)<br>// 99.5 // q12                                                                                                                                        |  | -<br>0.5<br>4 | 0.037 | ---                                                                                            |
| 1388484<br>_at | Ube2c         | Rn.310<br>2   | chr5:193345<br>83-<br>19335249<br>(+) // 84.35 //<br>q12 ///<br>chr12:13093<br>644-<br>13094371<br>(+) // 90.61 //<br>q11 ///<br>chr3:155800<br>391-<br>155802751<br>(+) // 95.24 //<br>q42 |  | 0.5<br>8      | 0.045 | ubiquitin-<br>conjugating<br>enzyme E2C                                                        |
| 1378315<br>_at | ---           | Rn.147<br>582 | chr5:219488<br>15-<br>21949253 (-)<br>// 40.41 //<br>q13                                                                                                                                    |  | -<br>0.5<br>5 | 0.040 | ---                                                                                            |
| 1384770<br>_at | ---           | Rn.147<br>581 | chr5:288969<br>13-<br>28897334 (-)<br>// 100.0 //<br>q13                                                                                                                                    |  | -<br>0.8<br>1 | 0.002 | ---                                                                                            |
| 1384831<br>_at | Slc7a13       | Rn.227<br>08  | chr5:344377<br>02-<br>34438124<br>(+) // 50.94 //<br>q13                                                                                                                                    |  | -<br>1.2<br>8 | 0.000 | solute carrier<br>family 7,<br>(cationic amino<br>acid transporter,<br>y+ system)<br>member 13 |
| 1393945<br>_at | ---           | Rn.147<br>572 | chr5:407068<br>87-                                                                                                                                                                          |  | 0.6<br>4      | 0.031 | ---                                                                                            |

|                |           |               |                                                            |               |       |                                                                          |  |
|----------------|-----------|---------------|------------------------------------------------------------|---------------|-------|--------------------------------------------------------------------------|--|
|                |           |               | 40707255 (-)<br>// 95.32 //<br>q21                         |               |       |                                                                          |  |
| 1389756<br>_at | Melk      | Rn.282<br>32  | chr5:608477<br>03-<br>60848245<br>(+) // 99.82 //<br>q22   | 0.6<br>2      | 0.018 | maternal<br>embryonic<br>leucine zipper<br>kinase                        |  |
| 1389548<br>_at | Adhfe1    | Rn.171<br>73  | chr5:927693<br>3-9290608 (-)<br>// 74.69 //<br>q11         | -<br>0.5<br>5 | 0.036 | alcohol<br>dehydrogenase,<br>iron containing,<br>1                       |  |
| 1375653<br>_at | ---       | Rn.203<br>993 | chr6:113348<br>113-<br>113348784<br>(+) // 84.91 //<br>q31 | 1.3<br>0      | 0.000 | ---                                                                      |  |
| 1387423<br>_at | Lhcgr     | Rn.112<br>16  | chr6:126108<br>48-<br>12651587 (-)<br>// 65.88 //<br>q12   | -<br>0.6<br>0 | 0.020 | luteinizing<br>hormone/chorio<br>gonadotropin<br>receptor                |  |
| 1368224<br>_at | Serpina3n | Rn.202<br>939 | chr6:128461<br>774-<br>128469320<br>(+) // 99.76 //<br>q32 | 0.5<br>6      | 0.031 | serine (or<br>cysteine)<br>peptidase<br>inhibitor, clade<br>A, member 3N |  |
| 1379294<br>_at | ---       | Rn.130<br>51  | chr6:216371<br>29-<br>21637599 (-)<br>// 95.92 //<br>q13   | -<br>0.7<br>5 | 0.004 | ---                                                                      |  |
| 1391442<br>_at | Ehd3      | Rn.777<br>1   | chr6:216381<br>34-<br>21638721 (-)<br>// 79.88 //<br>q13   | -<br>0.6<br>0 | 0.021 | EH-domain<br>containing 3                                                |  |
| 1392730<br>_at | ---       | Rn.204<br>638 | chr6:240979<br>35-<br>24098520 (-)<br>// 96.06 //<br>q13   | 0.7<br>7      | 0.012 | ---                                                                      |  |
| 1393848<br>_at | Rrm2      | Rn.144<br>946 | chr6:423577<br>56-<br>42358068<br>(+) // 99.36 //          | 1.1<br>0      | 0.000 | ribonucleotide<br>reductase M2                                           |  |

|                |        |               |                                                                                                                                                                                                                                                            |               |       |                                                         |
|----------------|--------|---------------|------------------------------------------------------------------------------------------------------------------------------------------------------------------------------------------------------------------------------------------------------------|---------------|-------|---------------------------------------------------------|
|                |        |               | q16 ///<br>chr6:423550<br>82-<br>42355497<br>(+) // 99.36 //<br>q16 ///<br>chr19:25563<br>985-<br>25564297 (-)<br>// 99.36 //<br>q11                                                                                                                       |               |       |                                                         |
| 1389408<br>_at | Rrm2   | Rn.144<br>946 | chr6:423587<br>69-<br>42359312<br>(+) // 75.98 //<br>q16 ///<br>chr6:423561<br>88-<br>42356731<br>(+) // 73.84 //<br>q16 ///<br>chr19:25562<br>741-<br>25563284 (-)<br>// 73.67 //<br>q11 ///<br>chr19:25560<br>608-<br>25561151 (-)<br>// 73.84 //<br>q11 | 0.7<br>1      | 0.008 | ribonucleotide<br>reductase M2                          |
| 1396114<br>_at | ---    | Rn.211<br>596 | chr6:799286<br>08-<br>79929218 (-)<br>// 89.58 //<br>q23                                                                                                                                                                                                   | 0.6<br>6      | 0.018 | ---                                                     |
| 1395338<br>_at | Lrpprc | Rn.920<br>51  | chr6:815116<br>2-8156660 (-)<br>// 89.88 //<br>q12                                                                                                                                                                                                         | 0.8<br>0      | 0.009 | leucine-rich<br>PPR-motif<br>containing                 |
| 1397205<br>_at | Dhrs7  | Rn.119<br>024 | chr6:950056<br>46-<br>95006263 (-)<br>// 85.26 //<br>q24                                                                                                                                                                                                   | -<br>1.0<br>0 | 0.001 | dehydrogenase/<br>reductase (SDR<br>family) member<br>7 |
| 1387402        | Myh9   | Rn.113        | chr7:115681                                                                                                                                                                                                                                                | 0.6           | 0.042 | myosin, heavy                                           |

|              |           |           |                                                                                                                |  |       |       |                                                                                               |
|--------------|-----------|-----------|----------------------------------------------------------------------------------------------------------------|--|-------|-------|-----------------------------------------------------------------------------------------------|
| _at          |           | 85        | 460-115760836 (-) // 99.19 // q34                                                                              |  | 2     |       | chain 9, non-muscle                                                                           |
| 1367937_at   | Miox      | Rn.19959  | chr7:127632434-127634935 (+) // 94.04 // q34                                                                   |  | -0.81 | 0.005 | myo-inositol oxygenase                                                                        |
| 1368467_at   | Cyp4f1    | Rn.5722   | chr7:13589661-13600729 (-) // 98.89 // q11                                                                     |  | -0.75 | 0.006 | cytochrome P450, family 4, subfamily f, polypeptide 1                                         |
| 1376084_a_at | Espl1     | Rn.135286 | chr7:141072935-141074383 (+) // 98.54 // q36                                                                   |  | 0.63  | 0.019 | extra spindle poles like 1 (S. cerevisiae)                                                    |
| 1381482_at   | ---       | Rn.166635 | chr7:142102412-142102796 (+) // 60.75 // q36                                                                   |  | 0.73  | 0.008 | ---                                                                                           |
| 1368337_at   | Glycam1   | Rn.10939  | chr7:142455641-142457903 (-) // 96.69 // q36                                                                   |  | 0.61  | 0.050 | glycosylation dependent cell adhesion molecule 1                                              |
| 1369203_at   | Wif1      | Rn.74256  | chr7:60330516-60400696 (+) // 98.72 // q22                                                                     |  | -0.66 | 0.012 | Wnt inhibitory factor 1                                                                       |
| 1397704_at   | LOC691979 | Rn.145486 | chr7:68106108-68106720 (-) // 39.21 // q22 /// chr15:45238650-45239262 (-) // 43.33 // p12 /// chr15:55996223- |  | 0.55  | 0.044 | similar to N-acetyltransferase ESCO2 (Establishment of cohesion 1 homolog 2) (ECO1 homolog 2) |

|                |         |              |                                                                                                                                                                                                                                                                                                                                                          |               |       |                                                          |  |
|----------------|---------|--------------|----------------------------------------------------------------------------------------------------------------------------------------------------------------------------------------------------------------------------------------------------------------------------------------------------------------------------------------------------------|---------------|-------|----------------------------------------------------------|--|
|                |         |              | 55996835 (-)<br>// 39.21 //<br>q11                                                                                                                                                                                                                                                                                                                       |               |       |                                                          |  |
| 1384063<br>_at | Cthrc1  | Rn.946<br>8  | chr7:746377<br>55-<br>74640321<br>(+) // 94.1 //<br>q22                                                                                                                                                                                                                                                                                                  | 0.7<br>9      | 0.008 | collagen triple<br>helix repeat<br>containing 1          |  |
| 1376105<br>_at | Col14a1 | Rn.994<br>41 | chr7:920321<br>61-<br>92032967<br>(+) // 99.88 //<br>q32                                                                                                                                                                                                                                                                                                 | 0.7<br>3      | 0.018 | collagen, type<br>XIV, alpha 1                           |  |
| 1374775<br>_at | Mki67   | Rn.735<br>51 | chr7:924856<br>51-<br>92486249<br>(+) // 93.9 //<br>q32 ///<br>chrX:939988<br>74-<br>93999473<br>(+) // 93.58 //<br>q31 ///<br>chr18:39143<br>050-<br>39150353<br>(+) // 93.26 //<br>q11 ///<br>chr1:195310<br>031-<br>195313257<br>(-) // 96.47 //<br>q41 ///<br>chr2:130883<br>075-<br>130883673<br>(-) // 92.94 //<br>q26 ///<br>chr17:96790<br>831-9 | 0.5<br>5      | 0.049 | antigen<br>identified by<br>monoclonal<br>antibody Ki-67 |  |
| 1384183<br>_at | ---     | Rn.393<br>81 | chr8:125480<br>208-<br>125480639<br>(+) // 87.05 //<br>q32                                                                                                                                                                                                                                                                                               | -<br>0.6<br>2 | 0.032 | ---                                                      |  |
| 1387742        | Ccr2    | Rn.211       | chr8:128892                                                                                                                                                                                                                                                                                                                                              | 0.7           | 0.012 | chemokine (C-C                                           |  |



|              |       |           |                                              |  |       |       |                                                                     |
|--------------|-------|-----------|----------------------------------------------|--|-------|-------|---------------------------------------------------------------------|
| _at          |       | 983       | 783-128893905 (+) // 99.91 // q32            |  | 9     |       | motif) receptor 2                                                   |
| 1369290_at   | Ccr5  | Rn.10736  | chr8:128907156-128911211 (+) // 96.84 // q32 |  | 0.70  | 0.017 | chemokine (C-C motif) receptor 5                                    |
| 1373026_at   | Spc24 | Rn.162984 | chr8:20854253-20859032 (-) // 98.28 // q13   |  | 0.57  | 0.039 | SPC24, NDC80 kinetochore complex component, homolog (S. cerevisiae) |
| 1387703_a_at | Usp2  | Rn.203590 | chr8:47052084-47076289 (+) // 97.9 // q22    |  | -0.60 | 0.016 | ubiquitin specific peptidase 2                                      |
| 1375549_at   | ---   | Rn.168987 | chr8:47076382-47077631 (+) // 98.26 // q22   |  | -0.69 | 0.006 | ---                                                                 |
| 1381811_at   | ---   | Rn.92548  | chr8:47077615-47077945 (+) // 99.1 // q22    |  | -0.80 | 0.003 | ---                                                                 |
| 1367570_at   | Tagln | Rn.34397  | chr8:48901875-48907693 (-) // 92.93 // q22   |  | 0.64  | 0.018 | transgelin                                                          |
| 1397225_at   | ---   | Rn.170224 | chr8:51926554-51927008 (-) // 70.11 // q23   |  | -0.85 | 0.006 | ---                                                                 |
| 1380306_at   | ---   | Rn.54177  | chr8:51928782-51929247 (-) // 85.07 // q23   |  | -0.75 | 0.004 | ---                                                                 |
| 1392613      | ---   | Rn.166    | chr8:519292                                  |  | -     | 0.005 | ---                                                                 |

|              |                        |               |                                                                                                          |  |               |       |                                                    |
|--------------|------------------------|---------------|----------------------------------------------------------------------------------------------------------|--|---------------|-------|----------------------------------------------------|
| _at          |                        | 664           | 65-51930063 (-)<br>// 90.78 //<br>q23                                                                    |  | 0.8<br>3      |       |                                                    |
| 1391063_at   | Kif23                  | Rn.637<br>34  | chr8:66050159-66050549 (-)<br>// 100.0 //<br>q24                                                         |  | 0.5<br>7      | 0.044 | kinesin family member 23                           |
| 1388340_at   | Ns5atp9                | Rn.723<br>3   | chr8:70159233-70172540<br>(+) // 91.76 //<br>q24                                                         |  | 0.6<br>4      | 0.021 | NS5A (hepatitis C virus) transactivated protein 9  |
| 1370955_at   | Adam10                 | Rn.429<br>24  | chr8:75288633-75291137<br>(+) // 40.88 //<br>q24 ///<br>chr8:75202774-75233710 (-)<br>// 58.33 //<br>q24 |  | 0.9<br>8      | 0.001 | ADAM metallopeptidase domain 10                    |
| 1372523_at   | Gclc                   | Rn.836<br>5   | chr8:82762176-82762995<br>(+) // 100.0 //<br>q31                                                         |  | -<br>0.6<br>5 | 0.020 | glutamate-cysteine ligase, catalytic subunit       |
| 1368180_s_at | Gsta2 ///<br>LOC494499 | Rn.405<br>74  | chr8:83299323-83310573 (-)<br>// 85.77 //<br>q31                                                         |  | -<br>0.7<br>3 | 0.006 | glutathione S-transferase A2 /// LOC494499 protein |
| 1379448_at   | Ttk                    | Rn.107<br>533 | chr8:88942279-88944612<br>(+) // 75.4 //<br>q31                                                          |  | 0.7<br>1      | 0.009 | Ttk protein kinase                                 |
| 1394940_at   | Fam46a                 | Rn.788        | chr8:90503236-90505323 (-)<br>// 98.69 //<br>q31                                                         |  | 1.5<br>9      | 0.000 | family with sequence similarity 46, member A       |
| 1392685_at   | Ube2cbp                | Rn.205<br>206 | chr8:91537317-                                                                                           |  | -<br>0.5      | 0.034 | ubiquitin-conjugating                              |

|                |                |               |                                                          |  |               |       |                                                                                                         |
|----------------|----------------|---------------|----------------------------------------------------------|--|---------------|-------|---------------------------------------------------------------------------------------------------------|
|                |                |               | 91537978 (-)<br>// 99.39 //<br>q31                       |  | 4             |       | enzyme E2C<br>binding protein                                                                           |
| 1379747<br>_at | Prss35         | Rn.161<br>916 | chr8:920241<br>43-<br>92024661 (-)<br>// 97.35 //<br>q31 |  | -<br>2.8<br>5 | 0.000 | Protease,<br>serine, 35                                                                                 |
| 1392727<br>_at | RGD1307<br>365 | Rn.557<br>58  | chr8:924483<br>21-<br>92448938 (-)<br>// 80.1 // q31     |  | -<br>0.5<br>3 | 0.046 | similar to<br>KIAA1009<br>protein                                                                       |
| 1384370<br>_at | Mthfs          | Rn.221<br>5   | chr8:940583<br>62-<br>94062777<br>(+) // 91.68 //<br>q31 |  | 0.7<br>0      | 0.009 | 5,10-<br>methenyltetrahy<br>drofolate<br>synthetase (5-<br>formyltetrahydro<br>folate cyclo-<br>ligase) |
| 1381768<br>_at | Mthfs          | Rn.221<br>5   | chr8:941059<br>01-<br>94106254<br>(+) // 99.43 //<br>q31 |  | 1.0<br>9      | 0.000 | 5,10-<br>methenyltetrahy<br>drofolate<br>synthetase (5-<br>formyltetrahydro<br>folate cyclo-<br>ligase) |
| 1392719<br>_at | Mthfs          | Rn.221<br>5   | chr8:941076<br>62-<br>94108310<br>(+) // 67.44 //<br>q31 |  | 0.7<br>9      | 0.005 | 5,10-<br>methenyltetrahy<br>drofolate<br>synthetase (5-<br>formyltetrahydro<br>folate cyclo-<br>ligase) |
| 1380508<br>_at | ---            | Rn.643<br>42  | chr8:950036<br>65-<br>95004012 (-)<br>// 83.82 //<br>q31 |  | 0.6<br>7      | 0.013 | ---                                                                                                     |
| 1387672<br>_at | Gnmt           | Rn.111<br>42  | chr9:101270<br>76-<br>10130446<br>(+) // 97.95 //<br>q12 |  | -<br>0.5<br>9 | 0.020 | glycine N-<br>methyltransferas<br>e                                                                     |
| 1391378<br>_at | ---            | Rn.211<br>524 | chr9:110446<br>091-<br>110446436                         |  | -<br>0.6<br>5 | 0.029 | ---                                                                                                     |

|                |                |               |                                                                                                                                                    |               |       |                                                   |  |
|----------------|----------------|---------------|----------------------------------------------------------------------------------------------------------------------------------------------------|---------------|-------|---------------------------------------------------|--|
|                |                |               | (+) // 39.39 //<br>q38                                                                                                                             |               |       |                                                   |  |
| 1392702<br>_at | ---            | ---           | chr9:112684<br>763-<br>112685036<br>(+) // 35.36 //<br>q38                                                                                         | 0.6<br>2      | 0.018 | ---                                               |  |
| 1368236<br>_at | Mep1a          | Rn.162<br>65  | chr9:131707<br>61-<br>13201094<br>(+) // 99.39 //<br>q12                                                                                           | -<br>1.0<br>4 | 0.000 | mep1n 1 alpha                                     |  |
| 1385889<br>_at | RGD1565<br>095 | Rn.341<br>2   | chr9:363634<br>88-<br>36364345<br>(+) // 14.21 //<br>q21                                                                                           | 0.5<br>9      | 0.045 | Similar to<br>hypothetical<br>protein<br>MGC52110 |  |
| 1383439<br>_at | Npas2          | Rn.828<br>5   | chr9:384339<br>82-<br>38434350<br>(+) // 95.09 //<br>q21                                                                                           | -<br>0.5<br>8 | 0.030 | neuronal PAS<br>domain protein<br>2               |  |
| 1396055<br>_at | Col6a3         | Rn.219<br>672 | chr9:899751<br>77-<br>89978276 (-)<br>// 99.63 //<br>q35                                                                                           | 0.6<br>0      | 0.045 | procollagen,<br>type VI, alpha 3                  |  |
| 1368984<br>_at | Sept2          | Rn.985<br>70  | chr9:927686<br>93-<br>92787764<br>(+) // 96.62 //<br>q36 ///<br>chr15:49005<br>566-<br>49007307<br>(+) // 90.21 //<br>p11                          | 0.6<br>1      | 0.044 | septin 2                                          |  |
| 1375422<br>_at | ---            | ---           | chrUn:43378<br>9-434708 (-)<br>// 69.37 // ///<br>chrUn:42766<br>0-428579 (-)<br>// 69.47 // ///<br>chrUn:48299<br>7-483915 (-)<br>// 69.16 // /// | -<br>1.2<br>2 | 0.000 | ---                                               |  |

|                |         |              |                                                                                                                 |  |               |       |                                                     |
|----------------|---------|--------------|-----------------------------------------------------------------------------------------------------------------|--|---------------|-------|-----------------------------------------------------|
|                |         |              | chrUn:23399<br>826-<br>23400740 (-)<br>// 68.95 //                                                              |  |               |       |                                                     |
| 1367712<br>_at | Timp1   | Rn.257<br>54 | chrX:125424<br>80-<br>12547161 (-)<br>// 99.88 //<br>q12                                                        |  | 0.7<br>4      | 0.013 | TIMP<br>metallopeptidas<br>e inhibitor 1            |
| 1368627<br>_at | Rgn     | Rn.100<br>06 | chrX:130371<br>72-<br>13052846 (-)<br>// 99.44 //<br>q12                                                        |  | -<br>0.9<br>4 | 0.001 | regucalcin<br>(senescence<br>marker protein-<br>30) |
| 1384283<br>_at | Asb9    | Rn.227<br>49 | chrX:507122<br>65-<br>50720903 (-)<br>// 95.32 //<br>q21                                                        |  | -<br>0.7<br>2 | 0.004 | ankyrin repeat<br>and SOCS box-<br>containing 9     |
| 1387013<br>_at | Tmem27  | Rn.322<br>98 | chrX:511186<br>62-<br>51149768 (-)<br>// 99.75 //<br>q21                                                        |  | -<br>0.7<br>8 | 0.005 | transmembrane<br>protein 27                         |
| 1370728<br>_at | Il13ra1 | Rn.812<br>10 | chrX:876095<br>6-8820529 (-)<br>// 99.63 //<br>q12 ///<br>chr11:73147<br>625-<br>73148964 (-)<br>// 99.7 // q22 |  | 0.6<br>1      | 0.039 | interleukin 13<br>receptor, alpha<br>1              |

**Supplemental Table S3. Boundaries of SS.13<sup>BN</sup>-derived congenic lines newly defined by single nucleotide polymorphism (SNP) array.** Flanking markers at each end of a congenic region are shown. Each SNP name contains rat genome version, chromosome number (chr. 13), and base pair location on chr. 13. The number of SNPs analyzed within each congenic region is also shown. The development and characterization of the congenic lines were described previously (Moreno 2007). See Supplemental Methods for details on the SNP array analysis.

| SS.13 <sup>BN</sup> -derived congenic line | P-end SNP names                   | q-end SNP names                   | number of SNPs |
|--------------------------------------------|-----------------------------------|-----------------------------------|----------------|
| Line 5                                     | Rn34_13032726371-Rn34_13032797309 | Rn34_13045299284-Rn34_13045797163 | 5443           |
| Line 9                                     | Rn34_13045299284-Rn34_13045797163 | Rn34_13048606818-Rn34_13048990782 | 846            |
| Line 26                                    | Rn34_13066163425-Rn34_13066167690 | Rn34_13079111404-Rn34_13079126162 | 4375           |

**Supplemental Table S4. Top 10 canonical pathways identified by Ingenuity Pathway Analysis as highly represented in genes differentially expressed in mTALs between SS and SS.13<sup>BN</sup> rats on each salt diet.** Cxcr4, F5, Fcgr3a, Pla2g4a, and Ptgs2 are located on rat chr. 13.

| <b>Ingenuity Canonical Pathways</b>                 | <b>Molecules</b>                                         |
|-----------------------------------------------------|----------------------------------------------------------|
| <b>0.4% salt</b>                                    |                                                          |
| Atherosclerosis Signaling                           | COL1A1,PLA2G4A,IL6,COL3A1,TNFRSF12A                      |
| IL-6 Signaling                                      | COL1A1,IL6,TNFAIP6,A2M,HSPB1                             |
| Hepatic Fibrosis / Hepatic Stellate Cell Activation | COL1A1,CXCL3,TIMP1,IL6,A2M,COL3A1                        |
| Pathogenesis of Multiple Sclerosis                  | CCL4,CXCL11                                              |
| IL-17 Signaling                                     | TIMP1,PTGS2,IL6,CXCL11                                   |
| LXR/RXR Activation                                  | APOE,IL6,ABCA1                                           |
| Arachidonic Acid Metabolism                         | PLA2G4A,CYP4A22,GPX2,PTGS2                               |
| Acute Phase Response Signaling                      | HMOX1,SERPING1,CP,IL6,A2M                                |
| Dendritic Cell Maturation                           | COL1A1,IL6,FCGR3A,COL3A1                                 |
| Coagulation System                                  | F5,A2M                                                   |
| <b>8% salt for 7 days</b>                           |                                                          |
| Hepatic Fibrosis / Hepatic Stellate Cell Activation | MET,COL1A2,COL1A1,CXCL3,CCR5,TIMP1,KDR,MYH9,IL1B,IL6,A2M |
| Mitotic Roles of Polo-Like Kinase                   | KIF23,null,ESPL1,HSP90AB1,CCNB2,CDK1,KIF11               |
| Atherosclerosis Signaling                           | COL1A2,COL1A1,PLA2G4A,CXCR4,IL1B,IL6,CCR2                |
| Cell Cycle: G2/M DNA Damage Checkpoint Regulation   | null,TOP2A,CCNB2,CDK1                                    |
| ATM Signaling                                       | RAD51,null,CCNB2,CDK1                                    |
| Sonic Hedgehog Signaling                            | PRKACB,null,CDK1                                         |
| IL-6 Signaling                                      | COL1A1,IKBKB,IL1B,IL6,A2M                                |
| IL-10 Signaling                                     | IKBKB,CCR5,IL1B,IL6                                      |
| Tyrosine Metabolism                                 | HPD,BCKDHA,HGD,ADHFE1                                    |
| Pentose and Glucuronate Interconversions            | MIOX,AKR7A3,BCKDHA                                       |

**Supplemental Table S5. Top KEGG pathways (posterior probability > 0.5) and top genes given pathways identified by the Bayesian model analysis of data from rats fed the 0.4% NaCl diet.**

The pathways and genes were identified as being best able to discriminate SS and SS.13<sup>BN</sup> rats fed the 0.4% NaCl diet. See Methods for detail.

| <b>Pathway id</b> | <b>Pathway name</b>                         | <b>Posterior Probability</b> | <b>Top 10 genes with posterior probability &gt; 0.5 and in order of ranking</b> |
|-------------------|---------------------------------------------|------------------------------|---------------------------------------------------------------------------------|
| hmr04010          | MAPK signaling pathway                      | 0.9988                       | Hras, Nras, Mapk3, Mapk1, Kras, Egfr, Pdgfra, Prkcb, Prkca, Mapk13              |
| hmr04144          | Endocytosis                                 | 0.9735                       | Igf1r, Hras, Egfr, Met, Pdgfra, Kdr, Src, Cblb, Flt1, Kit                       |
| hmr05200          | Pathways in cancer                          | 0.8224                       | Pik3r2, Pik3ca, Pik3r3, Hras, Pik3r1, Pik3cd, Igf1r, Egfr, Nras, Mapk3          |
| hmr04080          | Neuroactive ligand-receptor interaction     | 0.8137                       | Grm2, Gabbr1                                                                    |
| hmr04062          | Chemokine signaling pathway                 | 0.6660                       | Gnai1, Pik3r3, Pik3r2, Pik3r1, Gnai2, Pik3ca, Gnai3, Pik3cd, Pik3cb, Mapk3      |
| hmr04141          | Protein processing in endoplasmic reticulum | 0.6387                       | Mapk9, Mapk10                                                                   |
| hmr04060          | Cytokine-cytokine receptor interaction      | 0.6089                       | Egfr, Met, Pdgfra, Kdr, Flt1, Kit, Csf1r, Flt4, Il2rb, Figf                     |
| hmr04910          | Insulin signaling pathway                   | 0.5984                       | Pik3r1, Pik3r2, Pik3ca, Pik3r3, Pik3cd, Hras, Mapk1, Nras, Mapk3, Kras          |
| hmr03013          | RNA transport                               | 0.5489                       | (none)                                                                          |



**Supplemental Figure S1. Verification of Affymetrix Expression Array results by real-time PCR.**

Data were from rats fed the 8% salt diet except the ones labeled "LS". LS, 0.4% NaCl diet. N=4 for Affymetrix Array, n=10-12 for real-time PCR, \*, significant differential expression between SS and SS.13<sup>BN</sup> according to the array (see Methods for criteria), #, P<0.05 according to real-time PCR.

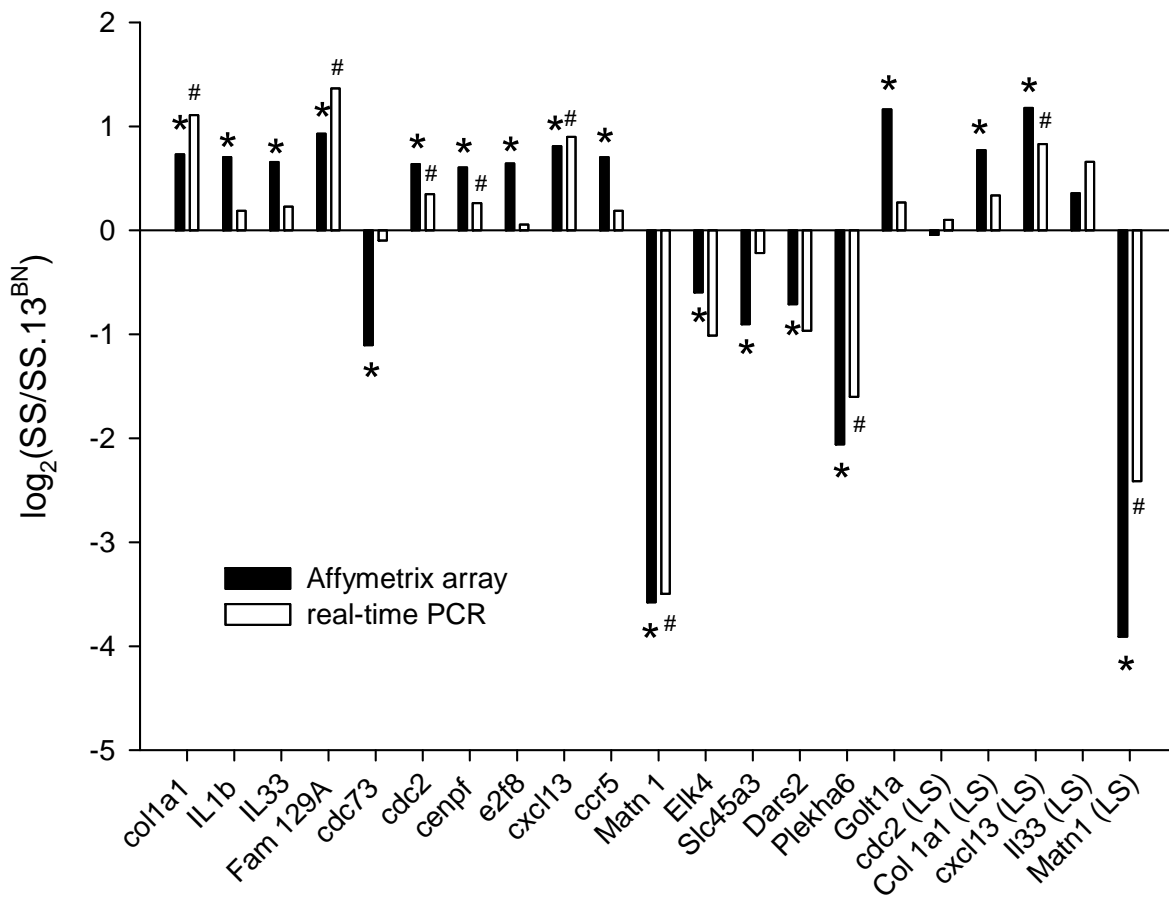

**Supplemental Figure S2. Validation of the H3-P antibody staining procedure in cultured HeLa cells.** HeLa cells were stained with DAPI (for nucleus staining) and the H3-P antibody used to stain kidney tissues. See Methods for details.

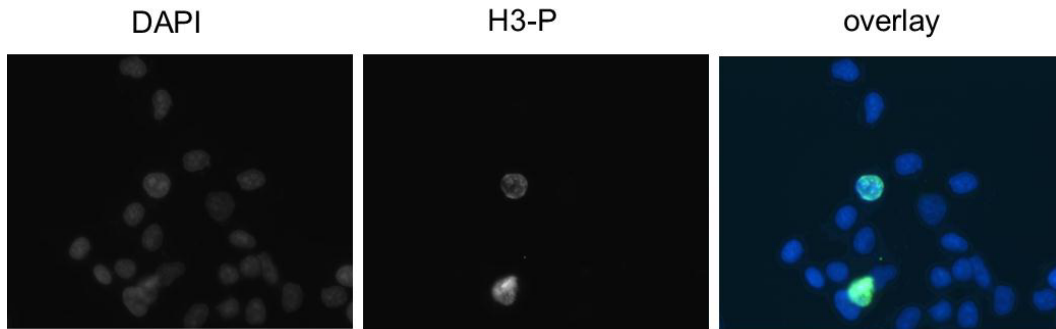

Supplement: NIHMS423022-supplement-1.pdf [file NIHMS423022-supplement-1.pdf]
